# Supplementary material
Source: PubMed Central journal article supplement (PMC6903403)
Supplement: NIHMS1525980-supplement-1.pdf [file NIHMS1525980-supplement-1.pdf]

Supplemental Materials to:

## **Clinical and Genome-Wide Analysis of Serum Platinum Levels after Cisplatin-Based Chemotherapy**

Matthew R. Trendowski<sup>1\*</sup>, Omar El-Charif<sup>1\*</sup>, Mark J. Ratain<sup>1</sup>, Patrick Monahan<sup>2</sup>, Zepeng Mu<sup>1</sup>, Heather E. Wheeler<sup>3</sup>, Paul C. Dinh, Jr<sup>2</sup>, Darren R. Feldman<sup>4</sup>, Shirin Ardeshir-Rouhani-Fard<sup>2</sup>, Robert J. Hamilton<sup>5</sup>, David J. Vaughn<sup>6</sup>, Chunkit Fung<sup>7</sup>, Christian Kollmannsberger<sup>8</sup>, Taisei Mushiroda<sup>9</sup>, Michiaki Kubo<sup>9</sup>, Robyn Hannigan<sup>10</sup>, Frederick Strathmann<sup>11</sup>, Lawrence H. Einhorn<sup>2</sup>, Sophie D. Fossa<sup>12</sup>, Lois B. Travis<sup>2#</sup> and M. Eileen Dolan<sup>1#</sup>

<sup>1</sup>Department of Medicine, University of Chicago, Chicago, IL, USA; <sup>2</sup>Department of Medical Oncology, Indiana University, Indianapolis, IN; <sup>3</sup>Departments of Biology and Computer Science, Loyola University Chicago, Chicago, IL, USA; <sup>4</sup>Department of Medical Oncology, Memorial Sloan-Kettering Cancer Center, New York, USA, NY; <sup>5</sup>Department of Surgical Oncology, Princess Margaret Cancer Centre, Toronto, ON, Canada; <sup>6</sup>Department of Medicine, University of Pennsylvania, Philadelphia, PA, USA; <sup>7</sup>Department of Radiation Oncology, Dana-Farber Cancer Institute, Boston, MA, USA; <sup>8</sup>J.P. Wilmot Cancer Institute, University of Rochester Medical Center, Rochester, NY, USA; <sup>9</sup>Division of Medical Oncology, University of British Columbia, Vancouver, BC, Canada; <sup>10</sup>RIKEN Center for Integrative Medical Science, Yokohama, Japan; <sup>11</sup>School for the Environment, University of Massachusetts Boston, Boston, MA; <sup>12</sup>NMS Labs, 3701 Welsh Road, Willow Grove, PA 19090; <sup>13</sup>Department of Oncology, Oslo University Hospital, Radiumhospital, Oslo, Norway

**\*Contributed equally to this manuscript.**

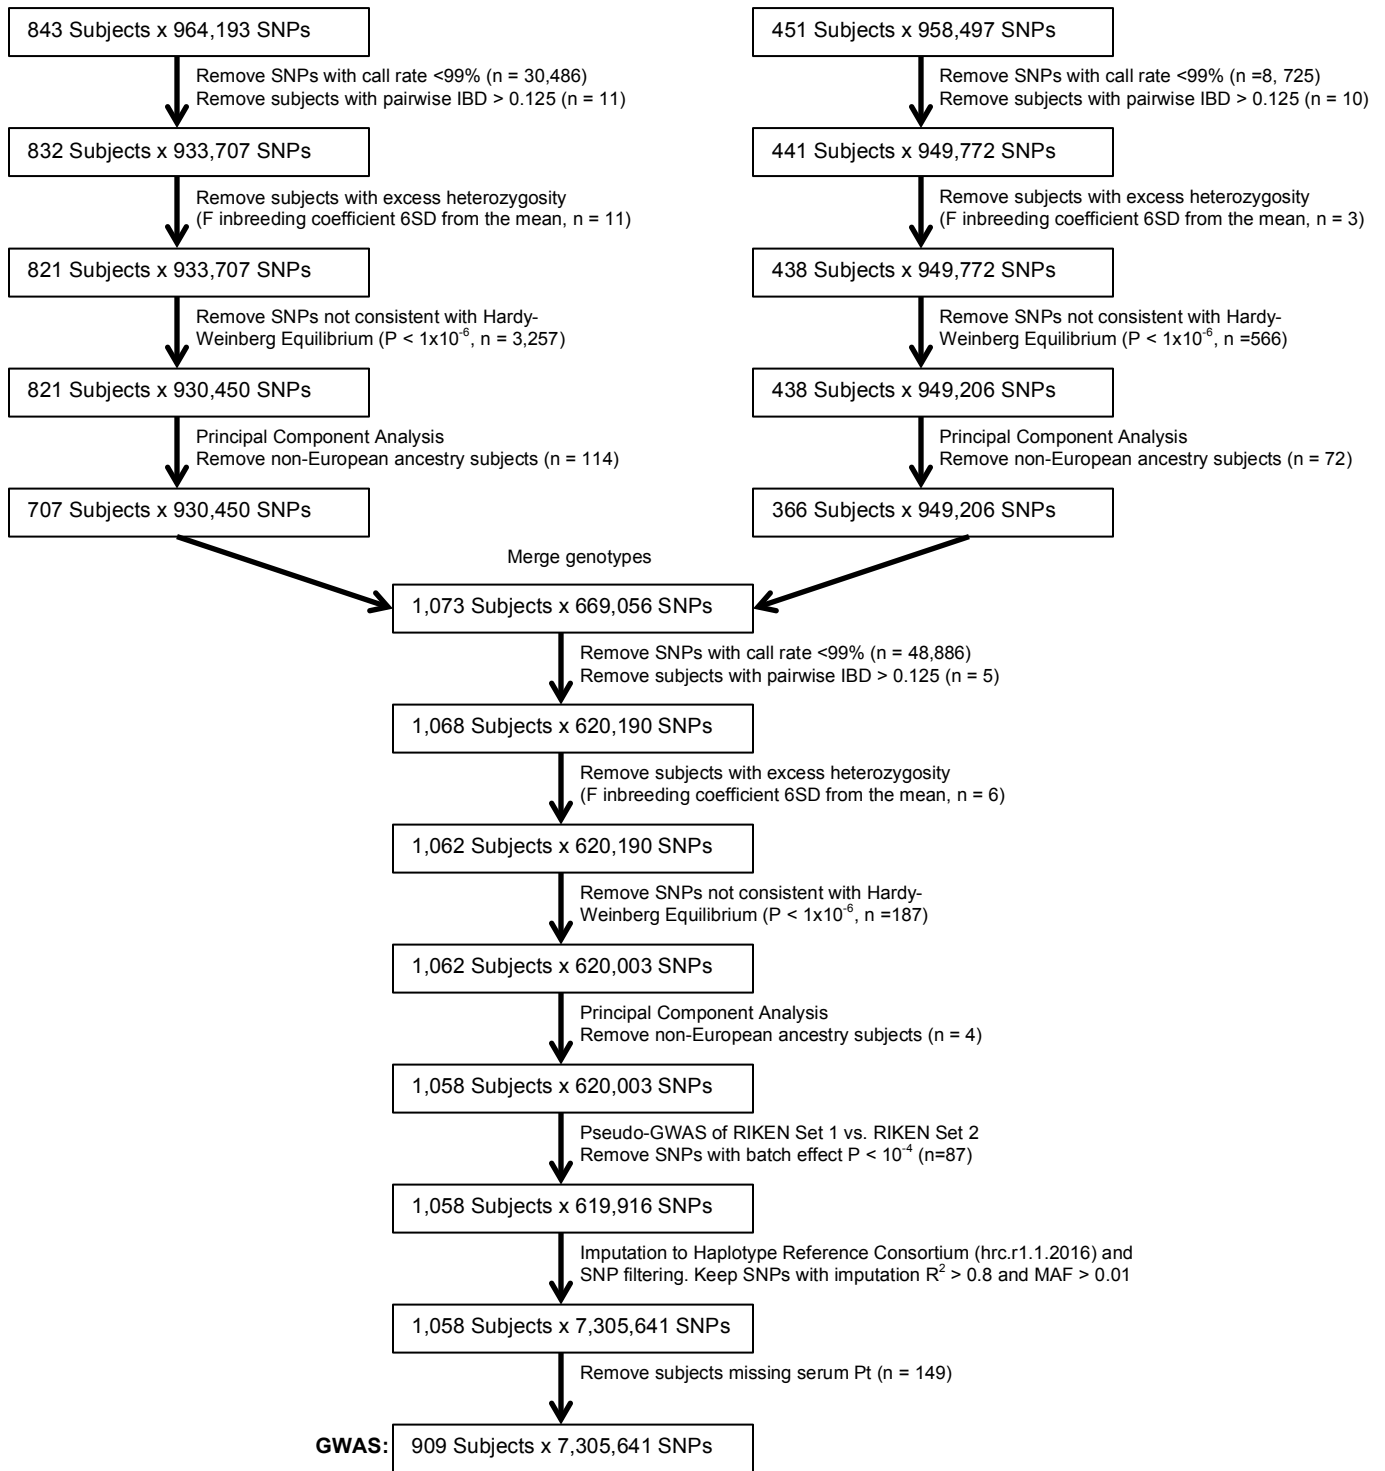

**Supplementary Figure S1. GWAS and Quality Control Pipeline.** Abbreviations: IBD = identity by descent, SD = standard deviation, MAF = minor allele frequency.

**Supplementary Table S1. Additional Clinical and Sociodemographic Characteristics for 1,010 Testicular Cancer Survivors According to Residual Platinum Values.**

| Characteristic                                                  | Residual Platinum Value   |                  |                   |                 |
|-----------------------------------------------------------------|---------------------------|------------------|-------------------|-----------------|
|                                                                 | All Patients<br>(n=1,010) | Low<br>(n=118)   | Medium<br>(n=785) | High<br>(n=107) |
| <b>Clinical characteristics</b>                                 |                           |                  |                   |                 |
| <b>Age at GCT diagnosis (years)</b>                             |                           |                  |                   |                 |
| Median (range)                                                  | 31 (15-54)                | 30 (15-53)       | 31 (15-54)        | 35 (16-50)      |
| <20                                                             | 70 (6.9%)                 | 16 (13.6%)       | 49 (6.2%)         | 5 (4.7%)        |
| 20-29                                                           | 390 (38.6%)               | 52 (44.1%)       | 311 (39.6%)       | 27 (25.2%)      |
| 30-39                                                           | 351 (34.8%)               | 32 (27.1%)       | 273 (34.8%)       | 46 (43.0%)      |
| 40-55                                                           | 199 (19.7%)               | 18 (15.3%)       | 152 (19.4%)       | 29 (27.1%)      |
| <b>BMI<sup>a</sup></b>                                          |                           |                  |                   |                 |
| Median (range)                                                  | 27.4 (18.1-53.9)          | 29.1 (21.3-53.9) | 27.2 (18.1-52.8)  | 27.2(19.5-46)   |
| <25                                                             | 223 (25.1%)               | 15 (14.0%)       | 178 (25.8%)       | 30 (32.6%)      |
| 25-29                                                           | 396 (44.5%)               | 45 (42.1%)       | 315 (45.6%)       | 36 (39.1%)      |
| 30-34                                                           | 185 (20.8%)               | 27 (25.2%)       | 137 (19.8%)       | 21 (22.8%)      |
| 35-39                                                           | 57 (6.4%)                 | 11 (10.3%)       | 43 (6.2%)         | 3 (3.3%)        |
| ≥40                                                             | 29 (3.3%)                 | 9 (8.4%)         | 18 (2.6%)         | 2 (2.2%)        |
| <b>Number of cycles, platinum-based chemotherapy</b>            |                           |                  |                   |                 |
| 3                                                               | 436 (43.2%)               | 50 (42.4%)       | 342 (43.6%)       | 44 (41.1%)      |
| 4                                                               | 572 (56.6%)               | 68 (57.6%)       | 443 (56.4%)       | 61 (57.0%)      |
| >4                                                              | 2 (0.2%)                  | 0 (0%)           | 0 (0%)            | 2 (1.9%)        |
| <b>Hypogonadism<sup>b,c</sup></b>                               |                           |                  |                   |                 |
| Yes                                                             | 163 (38.4%)               | 23 (39.0%)       | 125 (37.5%)       | 15 (45.5%)      |
| No                                                              | 262 (61.6%)               | 36 (61.0%)       | 208 (62.5%)       | 18 (54.5%)      |
| <b>CBM score for cisplatin-induced toxicities<sup>d,e</sup></b> |                           |                  |                   |                 |
| None                                                            | 271 (27.1%)               | 38 (32.2%)       | 218 (27.9%)       | 15 (15.0%)      |
| Very low                                                        | 359 (35.9%)               | 36 (30.5%)       | 280 (35.8%)       | 43 (43.0%)      |
| Low                                                             | 184 (18.4%)               | 19 (16.1%)       | 148 (18.8%)       | 17 (17.0%)      |
| Medium                                                          | 158 (15.8%)               | 22 (18.6%)       | 118 (15.1%)       | 18 (18.0%)      |
| High                                                            | 28 (2.8%)                 | 3 (2.5%)         | 18 (2.3%)         | 7 (7.0%)        |
| <b>Sociodemographic characteristics</b>                         |                           |                  |                   |                 |

| Characteristic                    | All Patients<br>(n=1,010) | Residual Platinum Value |                   |                 |
|-----------------------------------|---------------------------|-------------------------|-------------------|-----------------|
|                                   |                           | Low<br>(n=118)          | Medium<br>(n=785) | High<br>(n=107) |
| <b>Race</b>                       |                           |                         |                   |                 |
| White                             | 866 (85.7%)               | 103 (87.3%)             | 674 (85.9%)       | 89 (83.2%)      |
| Nonwhite                          | 17 (1.7%)                 | 3 (2.5%)                | 11 (1.4%)         | 3 (2.8%)        |
| Not stated                        | 127 (12.6%)               | 12 (10.2%)              | 100 (12.7%)       | 15 (14.0%)      |
| <b>Marital status<sup>f</sup></b> |                           |                         |                   |                 |
| Not married                       | 342 (35.9%)               | 34 (31.8%)              | 279 (39.7%)       | 29 (31.2%)      |
| Married/ living as married        | 560 (62.1%)               | 73 (68.2%)              | 423 (60.3%)       | 64 (68.8%)      |
| <b>Education</b>                  |                           |                         |                   |                 |
| High school or less               | 35 (3.5%)                 | 9 (7.6%)                | 23 (2.9%)         | 3 (2.8%)        |
| Some college/<br>college graduate | 541 (53.6%)               | 66 (55.9%)              | 423 (53.9%)       | 52 (48.6%)      |
| Postgraduate level                | 196 (19.4%)               | 19 (16.1%)              | 151 (19.2%)       | 26 (24.3%)      |
| Other or unknown                  | 238 (23.6%)               | 24 (20.3%)              | 188 (23.9%)       | 26 (24.3%)      |

Abbreviation: BMI: body mass index

<sup>a</sup>120 participants were missing BMI measurement.

<sup>b</sup>585 participants were not evaluated with laboratory measurements for hypogonadism.

<sup>c</sup>Defined as testosterone levels  $\leq 3$  ng/mL based on laboratory measurement or whether the patient was on testosterone therapy. All patients who had testosterone levels  $> 3$  ng/mL and were not on testosterone therapy were labeled as normal or high, and were grouped together as controls for the multinomial regression analysis, as in Abu Zaid et al (1).

<sup>d</sup>10 participants did not have CBM score determined.

<sup>e</sup>Was calculated by using adverse health outcomes previously related to cisplatin exposure (i.e, peripheral sensory neuropathy, hearing damage, tinnitus, and kidney disease), as in Kerns et al (2).

<sup>f</sup>108 participants did not have marital status stated.

**Supplementary Table S2. Univariate Multinomial Regression of the Association Between Residual Platinum Values and Clinical Phenotypes Relevant to Cisplatin-Based Chemotherapy.**

|                                                         | Variable Type | n (All Patients, Low, Medium, High) | Residual Platinum Value: Medium (n = 785) |                             | Residual Platinum Value: High (n = 107) |                             |
|---------------------------------------------------------|---------------|-------------------------------------|-------------------------------------------|-----------------------------|-----------------------------------------|-----------------------------|
|                                                         |               |                                     | OR (95% CI)                               | p-value                     | OR (95% CI)                             | p-value                     |
| <b>Risk Factors/Comorbidities</b>                       |               |                                     |                                           |                             |                                         |                             |
| Age at diagnosis                                        | continuous    | 1,010 (118, 785, 107)               | 1.03 (1.01, 1.06)                         | <b>5.40x10<sup>-3</sup></b> | 1.06 (1.03, 1.10)                       | <b>3.72x10<sup>-5</sup></b> |
| Creatinine clearance <sup>a</sup>                       | continuous    | 769 (94, 597, 78)                   | 0.99 (0.98, 0.99)                         | <b>5.38x10<sup>-4</sup></b> | 0.98 (0.96, 0.99)                       | <b>1.35x10<sup>-3</sup></b> |
| LDL (mg/dL)                                             | continuous    | 579 (73, 455, 51)                   | 1.00 (1.00, 1.01)                         | 0.07                        | 1.00 (0.99, 1.01)                       | 0.70                        |
| LH (mg/dL)                                              | continuous    | 436 (60, 334, 32)                   | 1.02 (0.97, 1.06)                         | 0.46                        | 1.02 (0.96, 1.08)                       | 0.52                        |
| Hypogonadism <sup>b</sup>                               | categorical   | 425 (59, 333, 33)                   | 0.96 (0.54, 1.69)                         | 0.88                        | 1.30 (0.55, 3.09)                       | 0.55                        |
| Testosterone (ng/mL)                                    | continuous    | 440 (60, 346, 34)                   | 1.02 (0.94, 1.11)                         | 0.58                        | 0.97 (0.81, 1.17)                       | 0.79                        |
| <b>Cisplatin-Induced Toxicities</b>                     |               |                                     |                                           |                             |                                         |                             |
| CBM score for cisplatin-induced toxicities <sup>c</sup> | categorical   | 1,000 (118, 782, 100)               | 0.99 (0.83, 1.18)                         | 0.94                        | 1.26 (0.99, 1.60)                       | <b>0.05</b>                 |
| Peripheral sensory neuropathy <sup>d</sup>              | categorical   | 996 (118, 773, 105)                 | 1.02 (0.76, 1.39)                         | 0.87                        | 1.61 (1.07, 2.41)                       | <b>0.02</b>                 |
| Raynaud phenomenon <sup>d</sup>                         | categorical   | 991 (118, 770, 103)                 | 1.20 (0.91, 1.59)                         | 0.20                        | 1.54 (1.08, 2.20)                       | <b>0.02</b>                 |
| Hearing Loss (rnGM412) <sup>e</sup>                     | continuous    | 749 (96, 570, 83)                   | 0.87 (0.69, 1.09)                         | 0.22                        | 1.03 (0.76, 1.39)                       | 0.86                        |
| Tinnitus                                                | categorical   | 954 (115, 738, 101)                 | 1.18 (0.78, 1.78)                         | 0.44                        | 1.69 (0.98, 2.94)                       | 0.06                        |

Abbreviations: CBM: cumulative burden of morbidity; HDL: high-density lipoprotein cholesterol; LDL: low-density lipoprotein cholesterol; LH: luteinizing hormone

For the multinomial regression model, the ordinal version of residual platinum values (low, medium, and high) was the dependent variable, with low residual platinum values being designated as the reference group. The other phenotypes were classified as independent variables. Bold indicates  $p \leq 0.05$ ; italics indicates  $0.05 < p < 0.10$ .

<sup>a</sup>Was calculated by using the following formula: creatinine clearance =  $(140 - \text{age at clinical examination}) \times \text{weight (kg)} / (72 \times \text{serum creatinine (mg/dL)})$ .

<sup>b</sup>Defined as testosterone levels  $\leq 3$  ng/mL based on crude measurement or whether the patient was on testosterone therapy. All patients who had testosterone levels  $> 3$  ng/mL and were not on testosterone therapy were labeled as normal or high, and were grouped together as controls for the multinomial regression analysis, as in Abu Zaid et al (1).

<sup>c</sup>Calculated by using selected adverse health outcomes previously related to cisplatin exposure (i.e., peripheral sensory neuropathy, hearing damage, tinnitus, and kidney disease), using a modified version of Kerns et al. (2) by removing autonomic neuropathy.

<sup>d</sup>Following conversion of the Likert scale: "none, a little, quite a bit, very much" to a 0-3 numeric scale, each individual was attributed a summary statistic for the sensory subscale (Cronbach ( $\alpha = 0.88$ )) and the motor subscale ( $\alpha = 0.78$ ) by taking the mean of the response in the subscale: none (mean = 0), mild ( $0 < \text{mean} \leq 1$ ), severe (mean  $> 1$ ), as in Dolan et al (3).

<sup>e</sup>Defined by the rank normalized geometric mean of air conduction thresholds measured at 4, 6, 8, 10, and 12 kHz, as in Frisina et al (4).

**Supplementary Table S3. Multinomial Regression of the Association Between Residual Platinum Values and Phenotypes Relevant to Cisplatin-Based Chemotherapy with Age at Diagnosis as a Covariate.**

|                                                         | Variable Type | n (All Patients, Low, Medium, High) | Residual Platinum Value: Medium<br>(n = 785) |                             | Residual Platinum Value: High<br>(n = 107) |                             |
|---------------------------------------------------------|---------------|-------------------------------------|----------------------------------------------|-----------------------------|--------------------------------------------|-----------------------------|
|                                                         |               |                                     | OR (95% CI)                                  | p-value                     | OR (95% CI)                                | p-value                     |
| <b>Risk Factors/Comorbidities</b>                       |               |                                     |                                              |                             |                                            |                             |
| Age at diagnosis                                        | continuous    | 1,010 (118, 785, 107)               | N/A                                          | N/A                         | N/A                                        | N/A                         |
| Creatinine clearance <sup>a</sup>                       | continuous    | 769 (94, 597, 78)                   | 0.99 (0.98, 1.00)                            | <b>4.83x10<sup>-3</sup></b> | 0.98 (0.96, 0.99)                          | <b>6.06x10<sup>-3</sup></b> |
| LDL (mg/dL)                                             | continuous    | 579 (73, 455, 51)                   | 1.00 (0.99, 1.01)                            | <i>0.08</i>                 | 1.00 (0.99, 1.01)                          | 0.79                        |
| LH (mg/dL)                                              | continuous    | 436 (60, 334, 32)                   | 1.02 (0.97, 1.06)                            | 0.46                        | 1.02 (0.96, 1.08)                          | 0.55                        |
| Hypogonadism <sup>b</sup>                               | categorical   | 425 (59, 333, 33)                   | 0.80 (0.45, 1.44)                            | 0.46                        | 1.05 (0.41, 2.44)                          | 0.99                        |
| Testosterone (ng/mL)                                    | continuous    | 440 (60, 346, 34)                   | 1.04 (0.92, 1.18)                            | 0.50                        | 1.01 (0.85, 1.21)                          | 0.87                        |
| <b>Cisplatin-Induced Toxicities</b>                     |               |                                     |                                              |                             |                                            |                             |
| CBM score for cisplatin-induced toxicities <sup>c</sup> | categorical   | 1,000 (118, 782, 100)               | 0.93 (0.78, 1.12)                            | 0.45                        | 1.13 (0.89, 1.44)                          | 0.32                        |
| Peripheral sensory neuropathy <sup>d</sup>              | categorical   | 996 (118, 773, 105)                 | 0.91 (0.67, 1.25)                            | 0.59                        | 1.34 (0.88, 2.03)                          | 0.17                        |
| Raynaud phenomenon <sup>d</sup>                         | categorical   | 991 (118, 770, 103)                 | 1.17 (0.88, 1.54)                            | 0.28                        | 1.46 (1.02, 2.09)                          | <b>0.04</b>                 |
| Hearing Loss (rnGM412) <sup>e</sup>                     | continuous    | 749 (96, 570, 83)                   | 0.67 (0.52, 0.86)                            | <b>2.43x10<sup>-3</sup></b> | 0.67 (0.47, 0.97)                          | <b>0.03</b>                 |
| Tinnitus                                                | categorical   | 954 (115, 738, 101)                 | 1.17 (0.77, 1.78)                            | 0.45                        | 1.68 (0.97, 2.94)                          | <i>0.07</i>                 |

Abbreviations: CBM: cumulative burden of morbidity; HDL: high-density lipoprotein cholesterol; LDL: low-density lipoprotein cholesterol; LH: luteinizing hormone

For the multinomial regression model, the ordinal version of residual platinum values (low, medium, and high) was the dependent variable, with low residual platinum values being designated as the reference group. The other phenotypes were classified as independent variables, and age at clinical examination was included as a covariate. Bold indicates  $p \leq 0.05$ ; italics indicates  $0.05 < p < 0.10$ .

<sup>a</sup>Was calculated by using the following formula: creatinine clearance =  $(140 - \text{age at clinical examination}) \times \text{weight (kg)} / (72 \times \text{serum creatinine (mg/dL)})$ .

<sup>b</sup>Defined as testosterone levels  $\leq 3$  ng/mL based on crude measurement or whether the patient was on testosterone therapy. All patients who had testosterone levels  $> 3$  ng/mL and were not on testosterone therapy were labeled as normal or high, and were grouped together as controls for the multinomial regression analysis, as in Abu Zaid et al (1).

<sup>c</sup>Calculated by using selected adverse health outcomes previously related to cisplatin exposure (i.e., peripheral sensory neuropathy, hearing damage, tinnitus, and kidney disease), using a modified version of Kerns et al. (2) by removing autonomic neuropathy.

<sup>d</sup>Following conversion of the Likert scale: "none, a little, quite a bit, very much" to a 0-3 numeric scale, each individual was attributed a summary statistic for the sensory subscale (Cronbach ( $\alpha = 0.88$ ) and the motor subscale ( $\alpha = 0.78$ ) by taking the mean of the response in the subscale: none (mean = 0), mild ( $0 < \text{mean} \leq 1$ ), severe (mean  $> 1$ ), as in Dolan et al (3).

<sup>e</sup>Defined by the rank normalized geometric mean of air conduction thresholds measured at 4, 6, 8, 10, and 12 kHz, as in Frisina et al (4).

**Supplementary Table S4. GWAS Results (P < 0.0001).**

| CHR | BP        | SNP         | EFFECT | REFERENCE | FRQ    | INFO   | BETA    | SE     | P        |
|-----|-----------|-------------|--------|-----------|--------|--------|---------|--------|----------|
| 19  | 50804066  | rs1377817   | G      | T         | 0.1299 | 1.0081 | -0.2303 | 0.0418 | 4.62E-08 |
| 19  | 50803571  | rs58754699  | T      | C         | 0.1298 | 1.0088 | -0.2299 | 0.0418 | 5.00E-08 |
| 19  | 50798679  | rs113890379 | A      | G         | 0.1311 | 1.0321 | -0.2178 | 0.0412 | 1.60E-07 |
| 2   | 2047397   | rs6759709   | G      | A         | 0.2572 | 0.9887 | 0.1671  | 0.0323 | 2.86E-07 |
| 2   | 2047397   | rs6759709   | G      | A         | 0.2572 | 0.9887 | 0.1671  | 0.0323 | 2.86E-07 |
| 7   | 96167810  | rs150691387 | G      | A         | 0.0135 | 0.9847 | 0.63    | 0.123  | 3.68E-07 |
| 19  | 50787642  | rs78604854  | C      | G         | 0.1337 | 1.0641 | -0.2058 | 0.0403 | 4.14E-07 |
| 11  | 12807189  | rs61878760  | A      | G         | 0.0896 | 0.9563 | 0.2499  | 0.0503 | 8.25E-07 |
| 19  | 50795001  | rs7247511   | A      | G         | 0.1865 | 1.0918 | -0.1731 | 0.0349 | 8.65E-07 |
| 19  | 50794970  | rs7247501   | A      | G         | 0.187  | 1.0908 | -0.1728 | 0.0349 | 8.86E-07 |
| 2   | 2102687   | rs6755567   | G      | A         | 0.2402 | 1.024  | 0.1607  | 0.0325 | 9.37E-07 |
| 2   | 2102687   | rs6755567   | G      | A         | 0.2402 | 1.024  | 0.1607  | 0.0325 | 9.37E-07 |
| 2   | 2103999   | rs13019515  | G      | A         | 0.2403 | 1.0235 | 0.1607  | 0.0326 | 9.43E-07 |
| 2   | 2103999   | rs13019515  | G      | A         | 0.2403 | 1.0235 | 0.1607  | 0.0326 | 9.43E-07 |
| 15  | 70810984  | rs36116683  | G      | A         | 0.2011 | 0.9747 | 0.1746  | 0.0355 | 1.03E-06 |
| 4   | 183553033 | rs138013532 | T      | C         | 0.0107 | 0.8981 | 0.7147  | 0.1454 | 1.06E-06 |
| 2   | 2109794   | rs35314672  | G      | A         | 0.2414 | 1.0173 | 0.1602  | 0.0326 | 1.07E-06 |
| 2   | 2109794   | rs35314672  | G      | A         | 0.2414 | 1.0173 | 0.1602  | 0.0326 | 1.07E-06 |
| 2   | 2110503   | rs34210742  | C      | T         | 0.2414 | 1.0172 | 0.1601  | 0.0326 | 1.09E-06 |
| 2   | 2110503   | rs34210742  | C      | T         | 0.2414 | 1.0172 | 0.1601  | 0.0326 | 1.09E-06 |
| 21  | 46563820  | rs13047590  | T      | C         | 0.1363 | 0.9937 | 0.1998  | 0.0411 | 1.37E-06 |
| 2   | 2086374   | rs1617213   | C      | T         | 0.2541 | 0.9844 | 0.1585  | 0.0326 | 1.39E-06 |
| 2   | 2086374   | rs1617213   | C      | T         | 0.2541 | 0.9844 | 0.1585  | 0.0326 | 1.39E-06 |
| 10  | 85778375  | rs11200804  | G      | A         | 0.1573 | 0.9777 | 0.1899  | 0.0394 | 1.74E-06 |
| 1   | 59556847  | rs4543825   | A      | G         | 0.212  | 0.9768 | -0.1678 | 0.0349 | 1.77E-06 |
| 2   | 2091619   | rs1421614   | T      | C         | 0.2536 | 0.994  | 0.1561  | 0.0325 | 1.81E-06 |
| 2   | 2091619   | rs1421614   | T      | C         | 0.2536 | 0.994  | 0.1561  | 0.0325 | 1.81E-06 |

|    |           |             |   |   |        |        |         |        |          |
|----|-----------|-------------|---|---|--------|--------|---------|--------|----------|
| 6  | 144224312 | rs9484827   | G | T | 0.0133 | 1.0704 | 0.5719  | 0.1192 | 1.89E-06 |
| 15 | 70811082  | rs6494875   | C | A | 0.2008 | 0.9771 | 0.1701  | 0.0355 | 1.92E-06 |
| 5  | 159341075 | rs80184476  | T | C | 0.0349 | 0.9922 | 0.3691  | 0.0771 | 1.96E-06 |
| 5  | 159342026 | rs77875476  | A | G | 0.0349 | 0.9934 | 0.3675  | 0.077  | 2.13E-06 |
| 5  | 159342345 | rs78007572  | G | A | 0.0349 | 0.9938 | 0.3669  | 0.077  | 2.19E-06 |
| 3  | 146147613 | rs563551865 | T | C | 0.0126 | 0.9303 | -0.6234 | 0.131  | 2.25E-06 |
| 5  | 159342843 | rs74425400  | T | C | 0.0349 | 0.9943 | 0.3661  | 0.0769 | 2.28E-06 |
| 5  | 159343166 | rs139748609 | A | C | 0.0349 | 0.9946 | 0.3657  | 0.0769 | 2.33E-06 |
| 5  | 159342808 | rs74440770  | C | T | 0.0356 | 0.9888 | 0.363   | 0.0764 | 2.36E-06 |
| 5  | 159344083 | rs2229181   | T | C | 0.035  | 0.9958 | 0.364   | 0.0768 | 2.52E-06 |
| 5  | 159354532 | rs114294707 | A | G | 0.035  | 0.9966 | 0.3638  | 0.0768 | 2.53E-06 |
| 5  | 159347613 | rs76661640  | A | C | 0.035  | 0.9966 | 0.3638  | 0.0768 | 2.53E-06 |
| 5  | 159348134 | rs77476585  | G | A | 0.035  | 0.9966 | 0.3638  | 0.0768 | 2.53E-06 |
| 5  | 159348665 | rs77392734  | A | C | 0.035  | 0.9966 | 0.3638  | 0.0768 | 2.53E-06 |
| 5  | 159346342 | rs79224140  | A | G | 0.035  | 0.9964 | 0.3638  | 0.0768 | 2.54E-06 |
| 5  | 159346362 | rs78464698  | T | C | 0.035  | 0.9964 | 0.3638  | 0.0768 | 2.54E-06 |
| 5  | 159344446 | rs3730284   | T | C | 0.035  | 0.996  | 0.3639  | 0.0768 | 2.54E-06 |
| 5  | 159345906 | rs75038956  | G | T | 0.035  | 0.9963 | 0.3638  | 0.0768 | 2.54E-06 |
| 5  | 159352459 | rs75398586  | A | T | 0.035  | 0.9966 | 0.3638  | 0.0768 | 2.54E-06 |
| 5  | 159345112 | rs78609450  | G | A | 0.035  | 0.9961 | 0.3638  | 0.0768 | 2.55E-06 |
| 5  | 159354433 | rs76889583  | G | A | 0.035  | 0.9959 | 0.3637  | 0.0768 | 2.55E-06 |
| 5  | 159353055 | rs76458976  | C | T | 0.035  | 0.996  | 0.3637  | 0.0768 | 2.56E-06 |
| 5  | 159353439 | rs79686163  | G | A | 0.035  | 0.9959 | 0.3637  | 0.0768 | 2.56E-06 |
| 5  | 159352409 | rs74417290  | A | G | 0.035  | 0.9951 | 0.3636  | 0.0768 | 2.56E-06 |
| 5  | 159355336 | rs115188683 | T | C | 0.035  | 0.9954 | 0.3636  | 0.0768 | 2.58E-06 |
| 5  | 159355916 | rs74319842  | C | T | 0.035  | 0.9942 | 0.3634  | 0.0768 | 2.62E-06 |
| 5  | 159355942 | rs114663835 | A | G | 0.035  | 0.9941 | 0.3634  | 0.0768 | 2.62E-06 |
| 19 | 50795879  | rs659773    | G | T | 0.186  | 1.0949 | -0.1651 | 0.0349 | 2.63E-06 |
| 7  | 76820800  | rs10252204  | A | C | 0.4261 | 0.9849 | -0.1349 | 0.0285 | 2.63E-06 |
| 5  | 159356026 | rs76011910  | A | G | 0.0351 | 0.993  | 0.3631  | 0.0768 | 2.67E-06 |



|    |           |             |   |   |        |        |         |        |          |
|----|-----------|-------------|---|---|--------|--------|---------|--------|----------|
| 8  | 3913060   | rs183748570 | A | G | 0.0147 | 0.8064 | 0.6129  | 0.1298 | 2.72E-06 |
| 5  | 159356875 | rs77670862  | T | C | 0.0351 | 0.9919 | 0.3628  | 0.0769 | 2.73E-06 |
| 5  | 159356906 | rs116547954 | T | C | 0.0351 | 0.9918 | 0.3627  | 0.0769 | 2.74E-06 |
| 5  | 159357298 | rs78253043  | A | G | 0.0352 | 0.9905 | 0.3626  | 0.0768 | 2.77E-06 |
| 1  | 59548314  | rs17466219  | C | T | 0.2131 | 0.9729 | -0.1644 | 0.0349 | 2.88E-06 |
| 5  | 159358878 | rs74641610  | C | T | 0.0353 | 0.9895 | 0.3613  | 0.0768 | 2.97E-06 |
| 5  | 159359512 | rs78223549  | A | G | 0.0353 | 0.9885 | 0.3606  | 0.0768 | 3.07E-06 |
| 5  | 159360438 | rs115000732 | G | A | 0.0353 | 0.9883 | 0.3602  | 0.0768 | 3.13E-06 |
| 5  | 159360770 | rs116446221 | T | C | 0.0354 | 0.9884 | 0.3598  | 0.0768 | 3.20E-06 |
| 3  | 146142255 | rs115704620 | C | T | 0.0632 | 0.8886 | -0.2879 | 0.0619 | 3.75E-06 |
| 18 | 47309540  | rs75276171  | G | A | 0.0611 | 0.9539 | 0.2797  | 0.0601 | 3.77E-06 |
| 18 | 47309909  | rs7237253   | G | A | 0.0611 | 0.9539 | 0.2797  | 0.0601 | 3.77E-06 |
| 3  | 172462474 | rs75979836  | G | C | 0.0547 | 0.8062 | 0.3189  | 0.0686 | 3.85E-06 |
| 18 | 47297521  | rs143619252 | A | G | 0.0615 | 0.9523 | 0.2784  | 0.06   | 3.95E-06 |
| 18 | 47310967  | rs80068204  | A | T | 0.0613 | 0.9512 | 0.279   | 0.0601 | 4.00E-06 |
| 18 | 47309884  | rs7233791   | C | G | 0.0599 | 0.9477 | 0.2826  | 0.0609 | 4.00E-06 |
| 18 | 47296455  | rs142158273 | T | C | 0.0616 | 0.9531 | 0.2779  | 0.0599 | 4.02E-06 |
| 18 | 47295988  | rs3889856   | T | G | 0.0616 | 0.9535 | 0.2777  | 0.0599 | 4.06E-06 |
| 2  | 241177042 | rs114949804 | C | G | 0.01   | 0.8619 | 0.7073  | 0.1526 | 4.08E-06 |
| 2  | 241177042 | rs114949804 | C | G | 0.01   | 0.8619 | 0.7073  | 0.1526 | 4.08E-06 |
| 2  | 72156702  | rs7587256   | A | G | 0.0396 | 1.0172 | 0.3333  | 0.0719 | 4.08E-06 |
| 2  | 72156702  | rs7587256   | A | G | 0.0396 | 1.0172 | 0.3333  | 0.0719 | 4.08E-06 |
| 10 | 85775159  | rs10788306  | A | G | 0.1937 | 0.9588 | 0.1698  | 0.0366 | 4.14E-06 |
| 10 | 85778523  | rs11200805  | T | A | 0.1937 | 0.9588 | 0.1698  | 0.0366 | 4.15E-06 |
| 10 | 85778903  | rs6585773   | C | T | 0.1937 | 0.9588 | 0.1698  | 0.0366 | 4.16E-06 |
| 2  | 156570190 | rs7579510   | C | A | 0.012  | 0.943  | 0.6159  | 0.133  | 4.19E-06 |
| 2  | 156570190 | rs7579510   | C | A | 0.012  | 0.943  | 0.6159  | 0.133  | 4.19E-06 |
| 11 | 12794946  | rs3915398   | G | A | 0.1119 | 0.9101 | 0.2176  | 0.047  | 4.26E-06 |
| 10 | 85779923  | rs7098745   | C | T | 0.1936 | 0.9582 | 0.1696  | 0.0367 | 4.29E-06 |
| 10 | 85780168  | rs7902759   | T | C | 0.1936 | 0.9581 | 0.1695  | 0.0367 | 4.32E-06 |

|    |           |             |   |   |        |        |         |        |          |
|----|-----------|-------------|---|---|--------|--------|---------|--------|----------|
| 5  | 159376710 | rs78335203  | A | T | 0.0359 | 0.9706 | 0.3552  | 0.077  | 4.55E-06 |
| 2  | 48070044  | rs7568939   | T | C | 0.0203 | 0.8401 | 0.5003  | 0.1088 | 4.88E-06 |
| 2  | 48070044  | rs7568939   | T | C | 0.0203 | 0.8401 | 0.5003  | 0.1088 | 4.88E-06 |
| 3  | 146180070 | rs76258070  | A | G | 0.0479 | 0.8864 | -0.3231 | 0.0703 | 4.88E-06 |
| 11 | 65637273  | rs501630    | G | A | 0.5545 | 0.9897 | -0.1299 | 0.0284 | 5.25E-06 |
| 10 | 85786038  | rs7921728   | C | A | 0.1935 | 0.9565 | 0.1682  | 0.0367 | 5.25E-06 |
| 10 | 85786610  | rs7908599   | A | G | 0.1935 | 0.9565 | 0.1682  | 0.0367 | 5.27E-06 |
| 7  | 157930243 | rs10949698  | C | A | 0.3239 | 0.9838 | 0.1383  | 0.0303 | 5.61E-06 |
| 3  | 185604948 | rs111649035 | C | T | 0.0114 | 0.9692 | 0.6144  | 0.1345 | 5.65E-06 |
| 2  | 154366274 | rs114985352 | T | C | 0.0153 | 0.7911 | 0.5881  | 0.1291 | 5.96E-06 |
| 2  | 154366274 | rs114985352 | T | C | 0.0153 | 0.7911 | 0.5881  | 0.1291 | 5.96E-06 |
| 5  | 159299561 | rs78989266  | C | T | 0.0368 | 0.9552 | 0.3472  | 0.0766 | 6.60E-06 |
| 2  | 50420757  | rs115487787 | T | C | 0.0463 | 0.9773 | 0.3084  | 0.0681 | 6.71E-06 |
| 2  | 50420757  | rs115487787 | T | C | 0.0463 | 0.9773 | 0.3084  | 0.0681 | 6.71E-06 |
| 3  | 153334750 | rs17506814  | G | A | 0.0131 | 0.8316 | 0.6165  | 0.1363 | 6.93E-06 |
| 1  | 59555169  | rs12404965  | G | A | 0.2237 | 0.9769 | -0.1549 | 0.0343 | 7.03E-06 |
| 1  | 212136070 | rs115440456 | C | T | 0.0495 | 0.7991 | -0.3291 | 0.0729 | 7.23E-06 |
| 5  | 159323156 | rs74747711  | G | A | 0.037  | 0.9863 | 0.3391  | 0.0753 | 7.58E-06 |
| 18 | 47292377  | rs8083124   | T | C | 0.0611 | 0.9424 | 0.2723  | 0.0605 | 7.60E-06 |
| 6  | 98198517  | rs144939408 | T | A | 0.0106 | 0.8459 | 0.6703  | 0.1491 | 7.90E-06 |
| 5  | 159349985 | rs79416469  | C | T | 0.034  | 0.9867 | 0.3521  | 0.0784 | 7.92E-06 |
| 9  | 136613623 | rs78280308  | A | T | 0.0325 | 0.8882 | 0.3793  | 0.0844 | 7.92E-06 |
| 2  | 164257937 | rs10469688  | G | A | 0.0264 | 0.9492 | 0.4037  | 0.0899 | 8.10E-06 |
| 2  | 164257937 | rs10469688  | G | A | 0.0264 | 0.9492 | 0.4037  | 0.0899 | 8.10E-06 |
| 3  | 151509744 | rs9289856   | C | T | 0.0283 | 0.973  | 0.3856  | 0.0863 | 8.99E-06 |
| 18 | 47326426  | rs183716438 | T | C | 0.0619 | 0.9489 | 0.2676  | 0.0599 | 9.05E-06 |
| 2  | 50443675  | rs2222316   | C | T | 0.0459 | 0.9825 | 0.3045  | 0.0682 | 9.08E-06 |
| 2  | 50443675  | rs2222316   | C | T | 0.0459 | 0.9825 | 0.3045  | 0.0682 | 9.08E-06 |
| 6  | 16951626  | rs76903139  | G | T | 0.043  | 0.8413 | 0.3411  | 0.0764 | 9.11E-06 |
| 9  | 90504714  | rs73653973  | T | G | 0.0425 | 0.967  | 0.3189  | 0.0715 | 9.31E-06 |

|    |           |             |   |   |        |        |         |        |          |
|----|-----------|-------------|---|---|--------|--------|---------|--------|----------|
| 18 | 47327759  | rs77983677  | G | A | 0.0619 | 0.9493 | 0.2671  | 0.0599 | 9.37E-06 |
| 8  | 8490501   | rs74615832  | A | G | 0.0727 | 0.8638 | 0.2689  | 0.0604 | 9.56E-06 |
| 4  | 10198932  | rs11732805  | C | T | 0.011  | 0.9276 | 0.6235  | 0.1402 | 9.74E-06 |
| 11 | 12772203  | rs117301475 | A | G | 0.0184 | 0.7717 | 0.5304  | 0.1193 | 9.91E-06 |
| 18 | 47329871  | rs7238567   | T | C | 0.0619 | 0.9483 | 0.2665  | 0.06   | 1.00E-05 |
| 1  | 59552704  | rs9970281   | G | T | 0.2242 | 0.979  | -0.152  | 0.0342 | 1.01E-05 |
| 8  | 1287641   | rs73170474  | A | C | 0.0523 | 0.99   | -0.2819 | 0.0635 | 1.01E-05 |
| 18 | 47330081  | rs74481622  | C | T | 0.0619 | 0.9483 | 0.2664  | 0.06   | 1.01E-05 |
| 22 | 29813175  | rs9625792   | C | T | 0.0441 | 0.9197 | 0.3173  | 0.0716 | 1.05E-05 |
| 13 | 93666376  | rs460850    | C | T | 0.8516 | 0.9364 | -0.1815 | 0.041  | 1.06E-05 |
| 18 | 47331659  | rs78558624  | C | T | 0.0619 | 0.9489 | 0.2655  | 0.06   | 1.07E-05 |
| 18 | 47332163  | rs140573335 | A | G | 0.0619 | 0.9489 | 0.2654  | 0.06   | 1.08E-05 |
| 6  | 6336740   | rs116617212 | T | C | 0.0134 | 0.9042 | 0.5737  | 0.1297 | 1.10E-05 |
| 4  | 10210648  | rs185700151 | A | C | 0.0132 | 0.975  | 0.5514  | 0.1249 | 1.14E-05 |
| 7  | 138728018 | rs59023152  | T | C | 0.0196 | 0.9713 | 0.4595  | 0.1041 | 1.14E-05 |
| 20 | 31873286  | rs6141913   | A | G | 0.2173 | 0.959  | 0.1541  | 0.0349 | 1.15E-05 |
| 4  | 10440936  | rs140477370 | T | A | 0.0133 | 0.9633 | 0.5524  | 0.1253 | 1.16E-05 |
| 2  | 102731596 | rs1007027   | C | A | 0.3294 | 0.9657 | -0.1361 | 0.0309 | 1.16E-05 |
| 2  | 102731596 | rs1007027   | C | A | 0.3294 | 0.9657 | -0.1361 | 0.0309 | 1.16E-05 |
| 4  | 10194891  | rs11727128  | G | A | 0.0133 | 0.9706 | 0.5497  | 0.1248 | 1.20E-05 |
| 8  | 1284211   | rs73170467  | A | G | 0.0244 | 1.0009 | -0.4011 | 0.0914 | 1.27E-05 |
| 14 | 23291551  | rs117373989 | A | C | 0.0448 | 0.8485 | 0.3233  | 0.0737 | 1.29E-05 |
| 2  | 156566726 | rs73965656  | T | C | 0.0118 | 0.9468 | 0.5867  | 0.1339 | 1.32E-05 |
| 2  | 156566726 | rs73965656  | T | C | 0.0118 | 0.9468 | 0.5867  | 0.1339 | 1.32E-05 |
| 8  | 1284547   | rs56071402  | A | C | 0.0244 | 0.9999 | -0.4005 | 0.0914 | 1.32E-05 |
| 1  | 59534195  | rs34071988  | T | A | 0.227  | 0.9847 | -0.1488 | 0.034  | 1.36E-05 |
| 2  | 156555762 | rs77079095  | C | T | 0.0118 | 0.9432 | 0.5872  | 0.1343 | 1.38E-05 |
| 2  | 156555762 | rs77079095  | C | T | 0.0118 | 0.9432 | 0.5872  | 0.1343 | 1.38E-05 |
| 12 | 106302694 | rs78225733  | T | C | 0.0162 | 0.8238 | 0.536   | 0.1226 | 1.39E-05 |
| 17 | 71130961  | rs2344994   | C | T | 0.7719 | 1.0018 | 0.1464  | 0.0335 | 1.41E-05 |

|    |           |             |   |   |        |        |         |        |          |
|----|-----------|-------------|---|---|--------|--------|---------|--------|----------|
| 11 | 18286807  | rs750948    | T | C | 0.0216 | 0.9679 | -0.4304 | 0.0986 | 1.43E-05 |
| 10 | 73047181  | rs151211976 | T | C | 0.0126 | 0.7884 | 0.6199  | 0.1421 | 1.44E-05 |
| 3  | 151512034 | rs115608419 | G | T | 0.0296 | 0.9763 | 0.3677  | 0.0843 | 1.45E-05 |
| 12 | 92342258  | rs63482062  | C | T | 0.0132 | 0.8673 | 0.578   | 0.1326 | 1.46E-05 |
| 9  | 136112029 | rs78433526  | G | A | 0.0111 | 0.8763 | 0.6308  | 0.1447 | 1.47E-05 |
| 9  | 136112069 | rs79382109  | A | G | 0.011  | 0.8765 | 0.6307  | 0.1447 | 1.47E-05 |
| 1  | 59540105  | rs4421614   | C | T | 0.2253 | 0.976  | -0.1491 | 0.0342 | 1.48E-05 |
| 8  | 1286467   | rs73170473  | A | G | 0.0243 | 0.9945 | -0.3994 | 0.0918 | 1.53E-05 |
| 1  | 59537214  | rs7536474   | A | G | 0.1421 | 0.9983 | 0.1753  | 0.0403 | 1.53E-05 |
| 16 | 65820295  | rs7198565   | A | C | 0.0911 | 0.9905 | 0.2143  | 0.0493 | 1.53E-05 |
| 16 | 65818152  | rs28386180  | T | G | 0.0906 | 0.9921 | 0.2144  | 0.0493 | 1.54E-05 |
| 14 | 34436723  | rs8005064   | C | G | 0.6362 | 0.8796 | 0.1352  | 0.0311 | 1.57E-05 |
| 22 | 36639067  | rs13054261  | T | C | 0.2074 | 0.9588 | 0.1541  | 0.0355 | 1.60E-05 |
| 7  | 138727771 | rs111377784 | A | C | 0.0207 | 0.9705 | 0.4392  | 0.1013 | 1.61E-05 |
| 7  | 138727353 | rs10245897  | A | T | 0.0207 | 0.97   | 0.4392  | 0.1013 | 1.61E-05 |
| 2  | 233346027 | rs746379    | G | C | 0.2657 | 0.9523 | 0.142   | 0.0328 | 1.63E-05 |
| 2  | 233346027 | rs746379    | G | C | 0.2657 | 0.9523 | 0.142   | 0.0328 | 1.63E-05 |
| 16 | 65813222  | rs9931033   | A | G | 0.0917 | 0.9908 | 0.2126  | 0.0491 | 1.65E-05 |
| 16 | 65812859  | rs28399714  | T | G | 0.0917 | 0.9909 | 0.2126  | 0.0491 | 1.65E-05 |
| 22 | 36639308  | rs5750243   | T | C | 0.208  | 0.9662 | 0.1529  | 0.0353 | 1.68E-05 |
| 7  | 157906182 | rs2335844   | G | C | 0.3272 | 0.9817 | 0.1308  | 0.0302 | 1.70E-05 |
| 22 | 36639421  | rs4378900   | A | G | 0.2081 | 0.9673 | 0.1527  | 0.0353 | 1.70E-05 |
| 15 | 93010321  | rs116928729 | A | G | 0.0176 | 0.8056 | 0.5182  | 0.1199 | 1.72E-05 |
| 7  | 157909775 | rs4909241   | G | T | 0.3272 | 0.9814 | 0.1307  | 0.0302 | 1.72E-05 |
| 7  | 157917414 | rs4909253   | A | G | 0.3274 | 0.9818 | 0.1306  | 0.0302 | 1.74E-05 |
| 2  | 156556800 | rs11901099  | G | A | 0.0113 | 0.9412 | 0.5949  | 0.1378 | 1.75E-05 |
| 2  | 156556800 | rs11901099  | G | A | 0.0113 | 0.9412 | 0.5949  | 0.1378 | 1.75E-05 |
| 9  | 14726174  | rs76660602  | C | G | 0.0106 | 0.7463 | 0.688   | 0.1593 | 1.75E-05 |
| 19 | 50816020  | rs116046797 | A | G | 0.0832 | 0.9607 | -0.2269 | 0.0525 | 1.75E-05 |
| 7  | 157920125 | rs13437759  | A | G | 0.3274 | 0.9819 | 0.1305  | 0.0302 | 1.75E-05 |

|    |           |             |   |   |        |        |         |        |          |
|----|-----------|-------------|---|---|--------|--------|---------|--------|----------|
| 17 | 71127471  | rs28410243  | A | G | 0.1862 | 0.9895 | -0.1569 | 0.0363 | 1.77E-05 |
| 14 | 34674161  | rs12590234  | C | T | 0.4919 | 0.9223 | -0.1268 | 0.0294 | 1.78E-05 |
| 1  | 59535204  | rs12402173  | C | T | 0.2258 | 0.9809 | -0.1472 | 0.0341 | 1.79E-05 |
| 19 | 50816768  | rs9916985   | G | T | 0.0837 | 0.9586 | -0.2261 | 0.0524 | 1.81E-05 |
| 2  | 58523256  | rs74887875  | T | C | 0.0226 | 0.9241 | 0.426   | 0.0988 | 1.81E-05 |
| 2  | 58523256  | rs74887875  | T | C | 0.0226 | 0.9241 | 0.426   | 0.0988 | 1.81E-05 |
| 22 | 36636794  | rs34223341  | A | G | 0.2114 | 0.9422 | 0.1533  | 0.0356 | 1.82E-05 |
| 21 | 39202275  | rs117930146 | G | T | 0.0339 | 1.0513 | 0.3275  | 0.076  | 1.83E-05 |
| 7  | 157927537 | rs6944055   | G | A | 0.323  | 0.9746 | 0.1312  | 0.0305 | 1.85E-05 |
| 7  | 157927166 | rs6943534   | T | A | 0.323  | 0.9747 | 0.1312  | 0.0305 | 1.85E-05 |
| 8  | 87748951  | rs139032104 | A | G | 0.0187 | 0.8576 | 0.4849  | 0.1126 | 1.85E-05 |
| 7  | 157927193 | rs6960916   | A | G | 0.323  | 0.9747 | 0.1312  | 0.0305 | 1.86E-05 |
| 7  | 157927858 | rs10231602  | G | T | 0.323  | 0.9746 | 0.1311  | 0.0305 | 1.86E-05 |
| 17 | 71126836  | rs9902588   | T | C | 0.186  | 0.9836 | -0.1569 | 0.0365 | 1.87E-05 |
| 8  | 14596257  | rs138531759 | C | T | 0.0179 | 0.9113 | -0.4809 | 0.1118 | 1.90E-05 |
| 21 | 37538063  | rs9984678   | A | G | 0.1957 | 0.9433 | -0.158  | 0.0367 | 1.90E-05 |
| 7  | 138735270 | rs7782919   | T | C | 0.0328 | 0.9371 | 0.3525  | 0.082  | 1.91E-05 |
| 8  | 36673279  | rs147078296 | G | A | 0.0271 | 0.9442 | 0.3838  | 0.0893 | 1.93E-05 |
| 16 | 65805462  | rs72784570  | A | G | 0.0914 | 0.9907 | 0.2113  | 0.0492 | 1.94E-05 |
| 19 | 50817702  | rs77696005  | C | A | 0.0842 | 0.958  | -0.2245 | 0.0523 | 1.94E-05 |
| 15 | 70818373  | rs4407020   | G | T | 0.2131 | 1.027  | 0.1457  | 0.0339 | 1.95E-05 |
| 20 | 31865697  | rs7262822   | A | G | 0.2242 | 0.9789 | 0.147   | 0.0342 | 1.96E-05 |
| 15 | 70817811  | rs4539552   | G | A | 0.2092 | 1.0371 | 0.1459  | 0.034  | 1.96E-05 |
| 22 | 36640533  | rs5756113   | A | C | 0.2086 | 0.9659 | 0.1516  | 0.0353 | 1.96E-05 |
| 10 | 29325167  | rs117756384 | A | T | 0.0351 | 0.9702 | -0.3329 | 0.0776 | 1.98E-05 |
| 7  | 157928503 | rs4349930   | A | T | 0.3224 | 0.9761 | 0.1306  | 0.0305 | 2.00E-05 |
| 7  | 157928660 | rs6459841   | C | G | 0.3222 | 0.9755 | 0.1307  | 0.0305 | 2.00E-05 |
| 7  | 157928710 | rs4475429   | T | C | 0.3219 | 0.9779 | 0.1305  | 0.0304 | 2.00E-05 |
| 7  | 157928642 | rs4458820   | A | G | 0.3222 | 0.9755 | 0.1307  | 0.0305 | 2.00E-05 |
| 7  | 157928460 | rs6966663   | C | G | 0.3224 | 0.9763 | 0.1306  | 0.0305 | 2.01E-05 |

|    |           |             |   |   |        |        |         |        |          |
|----|-----------|-------------|---|---|--------|--------|---------|--------|----------|
| 7  | 157928610 | rs6459840   | G | A | 0.3224 | 0.9763 | 0.1306  | 0.0305 | 2.01E-05 |
| 7  | 157928572 | rs4349931   | A | G | 0.3224 | 0.9763 | 0.1305  | 0.0305 | 2.02E-05 |
| 7  | 157928272 | rs6967448   | G | C | 0.3224 | 0.9762 | 0.1305  | 0.0305 | 2.02E-05 |
| 16 | 65800850  | rs141403560 | G | C | 0.0921 | 0.99   | 0.2101  | 0.049  | 2.02E-05 |
| 5  | 16854994  | rs2560858   | G | A | 0.2809 | 0.9237 | 0.1395  | 0.0325 | 2.02E-05 |
| 16 | 65802899  | rs72784567  | T | C | 0.0915 | 0.9912 | 0.2106  | 0.0491 | 2.03E-05 |
| 20 | 31862091  | rs6141909   | T | C | 0.2246 | 0.9826 | 0.1462  | 0.0341 | 2.05E-05 |
| 7  | 157928998 | rs7803631   | A | G | 0.3225 | 0.9762 | 0.1304  | 0.0305 | 2.06E-05 |
| 7  | 157928976 | rs7803621   | A | G | 0.3225 | 0.9762 | 0.1304  | 0.0305 | 2.06E-05 |
| 5  | 142433411 | rs2398565   | G | A | 0.023  | 1.0387 | 0.3955  | 0.0924 | 2.07E-05 |
| 7  | 157929076 | rs7787501   | T | A | 0.3226 | 0.9764 | 0.1303  | 0.0305 | 2.08E-05 |
| 16 | 65802172  | rs55958810  | A | G | 0.0916 | 0.9918 | 0.2102  | 0.0491 | 2.09E-05 |
| 7  | 157929223 | rs3800858   | A | G | 0.3226 | 0.9765 | 0.1302  | 0.0305 | 2.10E-05 |
| 19 | 50809274  | rs144748691 | A | G | 0.0653 | 0.9342 | -0.2548 | 0.0596 | 2.11E-05 |
| 4  | 67676396  | rs114671118 | A | G | 0.0229 | 0.8345 | -0.4419 | 0.1034 | 2.11E-05 |
| 7  | 157928246 | rs6966230   | A | G | 0.3224 | 0.9762 | 0.1302  | 0.0305 | 2.12E-05 |
| 16 | 65801698  | rs1966503   | A | G | 0.0916 | 0.9926 | 0.2099  | 0.0491 | 2.12E-05 |
| 17 | 71126929  | rs9909102   | G | A | 0.1853 | 0.9828 | -0.1561 | 0.0365 | 2.13E-05 |
| 17 | 71343370  | rs184838697 | T | A | 0.011  | 0.9286 | -0.6013 | 0.1408 | 2.14E-05 |
| 22 | 36640927  | rs13055888  | T | G | 0.2087 | 0.9659 | 0.1508  | 0.0353 | 2.15E-05 |
| 7  | 157918094 | rs4909255   | T | C | 0.3252 | 0.9833 | 0.1293  | 0.0303 | 2.16E-05 |
| 7  | 157920247 | rs13437762  | T | G | 0.3279 | 0.9802 | 0.1292  | 0.0302 | 2.17E-05 |
| 7  | 157918582 | rs4909094   | T | C | 0.3252 | 0.9834 | 0.1293  | 0.0303 | 2.17E-05 |
| 11 | 134019675 | rs11223715  | C | T | 0.0748 | 0.9161 | 0.238   | 0.0558 | 2.19E-05 |
| 3  | 172567112 | rs79520329  | G | A | 0.0612 | 0.8139 | 0.2769  | 0.0649 | 2.19E-05 |
| 2  | 156553677 | rs11901342  | T | G | 0.0114 | 0.9379 | 0.5852  | 0.1372 | 2.20E-05 |
| 2  | 156553677 | rs11901342  | T | G | 0.0114 | 0.9379 | 0.5852  | 0.1372 | 2.20E-05 |
| 11 | 65637076  | rs570387    | C | T | 0.5198 | 1.0051 | -0.1198 | 0.0281 | 2.23E-05 |
| 16 | 65800656  | rs139685695 | T | C | 0.0916 | 0.9904 | 0.2095  | 0.0492 | 2.24E-05 |
| 16 | 15870985  | rs113267683 | T | C | 0.0151 | 0.7832 | -0.5577 | 0.1309 | 2.25E-05 |

|    |           |             |   |   |        |        |         |        |          |
|----|-----------|-------------|---|---|--------|--------|---------|--------|----------|
| 1  | 83300093  | rs11580950  | A | G | 0.0999 | 0.7669 | 0.2297  | 0.0539 | 2.25E-05 |
| 20 | 31873821  | rs3746393   | T | C | 0.2228 | 0.9761 | 0.1463  | 0.0343 | 2.26E-05 |
| 7  | 157931263 | rs3752371   | C | G | 0.3231 | 0.9786 | 0.1295  | 0.0304 | 2.27E-05 |
| 20 | 31868249  | rs7263699   | C | T | 0.2262 | 0.9895 | 0.1447  | 0.034  | 2.29E-05 |
| 7  | 157930036 | rs6977814   | G | C | 0.3228 | 0.9777 | 0.1295  | 0.0304 | 2.29E-05 |
| 14 | 34638094  | rs12886379  | T | C | 0.4212 | 1.0042 | -0.1208 | 0.0284 | 2.30E-05 |
| 7  | 157930137 | rs12668329  | A | T | 0.3228 | 0.9778 | 0.1295  | 0.0304 | 2.30E-05 |
| 8  | 1287382   | rs73670773  | C | T | 0.0578 | 0.9706 | -0.2606 | 0.0613 | 2.32E-05 |
| 1  | 202424535 | rs114269248 | T | G | 0.0127 | 0.8762 | 0.5733  | 0.1348 | 2.32E-05 |
| 2  | 8033212   | rs11682406  | C | T | 0.0176 | 0.9606 | 0.4684  | 0.1101 | 2.33E-05 |
| 2  | 8033212   | rs11682406  | C | T | 0.0176 | 0.9606 | 0.4684  | 0.1101 | 2.33E-05 |
| 7  | 157930974 | rs3752366   | T | C | 0.3231 | 0.9769 | 0.1294  | 0.0304 | 2.34E-05 |
| 1  | 59488772  | rs2716108   | T | G | 0.1991 | 0.8031 | -0.168  | 0.0395 | 2.35E-05 |
| 7  | 157930619 | rs10949699  | A | C | 0.3229 | 0.9793 | 0.1292  | 0.0304 | 2.36E-05 |
| 17 | 29920645  | rs77144095  | T | C | 0.0199 | 0.8976 | 0.4512  | 0.1061 | 2.36E-05 |
| 20 | 31867286  | rs6141911   | A | T | 0.2247 | 0.9836 | 0.145   | 0.0341 | 2.40E-05 |
| 8  | 14585192  | rs186518397 | A | G | 0.0173 | 0.9109 | -0.4834 | 0.1139 | 2.41E-05 |
| 11 | 65636509  | rs659824    | G | A | 0.5227 | 1.0042 | -0.1193 | 0.0281 | 2.44E-05 |
| 18 | 47398040  | rs79374597  | T | C | 0.0622 | 0.9527 | 0.2536  | 0.0598 | 2.47E-05 |
| 18 | 47390805  | rs4939898   | T | C | 0.0622 | 0.9525 | 0.2536  | 0.0598 | 2.47E-05 |
| 10 | 44307607  | rs7906426   | G | A | 0.0932 | 1.0022 | -0.206  | 0.0486 | 2.48E-05 |
| 18 | 47393044  | rs4939596   | A | G | 0.0622 | 0.9526 | 0.2536  | 0.0598 | 2.48E-05 |
| 8  | 1283042   | rs73170465  | T | C | 0.0167 | 1.0189 | -0.4611 | 0.1088 | 2.49E-05 |
| 10 | 104249839 | rs1977382   | T | A | 0.2619 | 0.9485 | 0.1396  | 0.0329 | 2.49E-05 |
| 2  | 57931576  | rs187470710 | T | C | 0.0173 | 0.901  | 0.4834  | 0.1142 | 2.52E-05 |
| 2  | 57931576  | rs187470710 | T | C | 0.0173 | 0.901  | 0.4834  | 0.1142 | 2.52E-05 |
| 22 | 36641792  | rs62233823  | A | G | 0.2092 | 0.9635 | 0.1496  | 0.0353 | 2.53E-05 |
| 17 | 71153671  | rs9904568   | A | G | 0.1964 | 0.9822 | -0.1514 | 0.0358 | 2.54E-05 |
| 1  | 59533996  | rs4128414   | A | C | 0.2253 | 0.9826 | -0.1446 | 0.0341 | 2.54E-05 |
| 1  | 59533777  | rs4128413   | G | A | 0.2253 | 0.9824 | -0.1445 | 0.0341 | 2.55E-05 |

|    |           |             |   |   |        |        |         |        |          |
|----|-----------|-------------|---|---|--------|--------|---------|--------|----------|
| 1  | 59533336  | rs12402674  | T | A | 0.2253 | 0.9821 | -0.1445 | 0.0342 | 2.56E-05 |
| 20 | 31870090  | rs4911311   | C | G | 0.2248 | 0.9829 | 0.1445  | 0.0341 | 2.56E-05 |
| 15 | 70817246  | rs8034299   | G | T | 0.2068 | 1.0362 | 0.1445  | 0.0341 | 2.56E-05 |
| 15 | 70817223  | rs8033107   | T | C | 0.2068 | 1.0363 | 0.1445  | 0.0341 | 2.57E-05 |
| 1  | 59533223  | rs17118659  | A | G | 0.2253 | 0.982  | -0.1445 | 0.0342 | 2.57E-05 |
| 18 | 47395770  | rs78814171  | T | C | 0.0627 | 0.9519 | 0.2521  | 0.0596 | 2.58E-05 |
| 2  | 58556174  | rs186863356 | A | C | 0.0229 | 0.8884 | 0.4243  | 0.1003 | 2.58E-05 |
| 2  | 58556174  | rs186863356 | A | C | 0.0229 | 0.8884 | 0.4243  | 0.1003 | 2.58E-05 |
| 22 | 36642018  | rs34235585  | A | T | 0.2092 | 0.9634 | 0.1494  | 0.0353 | 2.59E-05 |
| 1  | 59532637  | rs6689928   | C | A | 0.2253 | 0.9814 | -0.1445 | 0.0342 | 2.60E-05 |
| 11 | 65638719  | rs633800    | A | G | 0.5235 | 1.0006 | -0.1191 | 0.0282 | 2.60E-05 |
| 10 | 44307693  | rs7917583   | G | A | 0.0927 | 1.0017 | -0.2061 | 0.0487 | 2.61E-05 |
| 10 | 44307687  | rs7900485   | T | G | 0.0927 | 1.0017 | -0.206  | 0.0487 | 2.61E-05 |
| 1  | 59531700  | rs12016654  | A | G | 0.2254 | 0.981  | -0.1444 | 0.0342 | 2.62E-05 |
| 4  | 10137711  | rs16893993  | A | C | 0.0698 | 0.9905 | 0.2354  | 0.0557 | 2.63E-05 |
| 1  | 212138895 | rs116415521 | A | C | 0.0408 | 0.782  | -0.3414 | 0.0808 | 2.63E-05 |
| 8  | 1277213   | rs73170459  | G | A | 0.0236 | 1.017  | -0.3892 | 0.0921 | 2.64E-05 |
| 7  | 44221942  | rs117544459 | A | C | 0.0166 | 0.8783 | 0.4998  | 0.1184 | 2.66E-05 |
| 10 | 44307717  | rs7920802   | A | T | 0.0927 | 1.0018 | -0.2058 | 0.0487 | 2.67E-05 |
| 15 | 70817307  | rs8033277   | T | C | 0.2062 | 1.0309 | 0.1447  | 0.0343 | 2.68E-05 |
| 3  | 30631458  | rs80138614  | T | G | 0.0628 | 0.8581 | -0.2654 | 0.0629 | 2.71E-05 |
| 5  | 142438134 | rs2190778   | A | T | 0.0228 | 1.0247 | 0.3937  | 0.0936 | 2.84E-05 |
| 17 | 71153536  | rs62071603  | A | G | 0.1958 | 0.9777 | -0.151  | 0.0359 | 2.84E-05 |
| 16 | 65840560  | rs72786512  | T | C | 0.0577 | 0.9803 | 0.2588  | 0.0616 | 2.88E-05 |
| 5  | 142437071 | rs2270067   | G | A | 0.0228 | 1.0256 | 0.393   | 0.0935 | 2.91E-05 |
| 9  | 135187714 | rs142304305 | T | C | 0.017  | 0.7625 | 0.5264  | 0.1253 | 2.92E-05 |
| 16 | 65797622  | rs9938100   | T | C | 0.0912 | 0.9844 | 0.2076  | 0.0494 | 2.92E-05 |
| 7  | 157930979 | rs3752367   | G | C | 0.3237 | 0.9758 | 0.1279  | 0.0304 | 2.94E-05 |
| 12 | 83670415  | rs187048210 | A | C | 0.0111 | 0.8438 | 0.6124  | 0.1459 | 2.96E-05 |
| 7  | 87071530  | rs45539339  | G | T | 0.072  | 0.9872 | 0.2321  | 0.0553 | 2.98E-05 |



|    |           |             |   |   |        |        |         |        |          |
|----|-----------|-------------|---|---|--------|--------|---------|--------|----------|
| 7  | 87071639  | rs45579433  | A | G | 0.072  | 0.9872 | 0.2321  | 0.0553 | 2.98E-05 |
| 12 | 114298643 | rs12231525  | T | A | 0.1693 | 0.9518 | 0.1621  | 0.0386 | 2.98E-05 |
| 7  | 157931119 | rs1130500   | G | A | 0.3235 | 0.9781 | 0.1276  | 0.0304 | 2.98E-05 |
| 7  | 157931144 | rs1130499   | T | C | 0.3235 | 0.9781 | 0.1276  | 0.0304 | 2.98E-05 |
| 8  | 1287425   | rs189301764 | T | G | 0.0238 | 0.9864 | -0.3914 | 0.0933 | 2.98E-05 |
| 7  | 87072226  | rs17149601  | T | C | 0.072  | 0.9873 | 0.2321  | 0.0553 | 2.99E-05 |
| 7  | 87072505  | rs17149606  | A | C | 0.072  | 0.9873 | 0.232   | 0.0553 | 2.99E-05 |
| 7  | 87072140  | rs45503798  | C | T | 0.072  | 0.9873 | 0.232   | 0.0553 | 2.99E-05 |
| 12 | 85520152  | rs73182415  | T | A | 0.0131 | 0.8348 | 0.5728  | 0.1365 | 3.00E-05 |
| 19 | 50818252  | rs115192757 | C | G | 0.0849 | 0.9513 | -0.2192 | 0.0523 | 3.01E-05 |
| 7  | 157894119 | rs4909223   | G | A | 0.3278 | 0.9604 | 0.1282  | 0.0306 | 3.03E-05 |
| 22 | 36643428  | rs71314972  | C | G | 0.2096 | 0.9621 | 0.1481  | 0.0353 | 3.04E-05 |
| 11 | 99038365  | rs10892836  | G | A | 0.4914 | 0.9256 | -0.1233 | 0.0294 | 3.04E-05 |
| 4  | 10145910  | rs34448220  | G | A | 0.0705 | 0.9863 | 0.233   | 0.0556 | 3.06E-05 |
| 16 | 65795849  | rs72784560  | T | C | 0.0918 | 0.9806 | 0.2067  | 0.0494 | 3.11E-05 |
| 10 | 104499232 | rs12762176  | T | A | 0.3185 | 0.9569 | 0.1294  | 0.0309 | 3.14E-05 |
| 2  | 46179662  | rs12471357  | C | T | 0.595  | 1.0231 | -0.1187 | 0.0284 | 3.17E-05 |
| 2  | 46179662  | rs12471357  | C | T | 0.595  | 1.0231 | -0.1187 | 0.0284 | 3.17E-05 |
| 18 | 12487778  | rs79993352  | C | T | 0.0105 | 0.8713 | 0.6169  | 0.1476 | 3.20E-05 |
| 16 | 63154176  | rs1625555   | C | T | 0.7131 | 0.9667 | 0.1342  | 0.0321 | 3.21E-05 |
| 3  | 60011473  | rs183872205 | G | A | 0.0525 | 0.9799 | 0.2674  | 0.064  | 3.22E-05 |
| 7  | 157931928 | rs11763130  | A | G | 0.581  | 1.0035 | -0.1188 | 0.0284 | 3.24E-05 |
| 8  | 80585763  | rs143460322 | A | C | 0.0124 | 0.8563 | -0.5765 | 0.138  | 3.26E-05 |
| 6  | 25466324  | rs144503707 | T | C | 0.0123 | 0.8478 | 0.5802  | 0.1389 | 3.26E-05 |
| 4  | 161872848 | rs10011575  | T | C | 0.3483 | 0.9845 | 0.1246  | 0.0299 | 3.28E-05 |
| 18 | 47372315  | rs58349995  | A | G | 0.0627 | 0.9517 | 0.2488  | 0.0596 | 3.28E-05 |
| 14 | 34634563  | rs10144484  | A | C | 0.4679 | 0.9545 | -0.1206 | 0.0289 | 3.29E-05 |
| 18 | 47367536  | rs2276169   | G | C | 0.0627 | 0.9519 | 0.2488  | 0.0596 | 3.29E-05 |
| 5  | 16632304  | rs77937257  | C | A | 0.0756 | 0.8549 | 0.2404  | 0.0576 | 3.29E-05 |
| 18 | 47359787  | rs870590    | A | G | 0.0627 | 0.952  | 0.2487  | 0.0596 | 3.29E-05 |

|    |           |             |   |   |        |        |         |        |          |
|----|-----------|-------------|---|---|--------|--------|---------|--------|----------|
| 18 | 47359444  | rs16951101  | G | A | 0.0627 | 0.9519 | 0.2487  | 0.0596 | 3.30E-05 |
| 13 | 93516511  | rs9301840   | C | G | 0.2963 | 0.9829 | 0.1299  | 0.0312 | 3.35E-05 |
| 18 | 47311513  | rs17657133  | G | A | 0.0573 | 0.9537 | 0.2595  | 0.0623 | 3.37E-05 |
| 1  | 212102560 | rs115291660 | G | A | 0.0499 | 0.8249 | -0.2985 | 0.0716 | 3.39E-05 |
| 4  | 10155484  | rs9991911   | G | A | 0.9273 | 0.984  | -0.2287 | 0.0549 | 3.40E-05 |
| 2  | 102728004 | rs1861284   | T | C | 0.3275 | 0.9642 | -0.1289 | 0.031  | 3.44E-05 |
| 2  | 102728004 | rs1861284   | T | C | 0.3275 | 0.9642 | -0.1289 | 0.031  | 3.44E-05 |
| 13 | 29328193  | rs7331284   | A | T | 0.4617 | 1.0144 | -0.1169 | 0.0281 | 3.47E-05 |
| 1  | 59535812  | rs7530655   | A | G | 0.1477 | 0.9925 | 0.166   | 0.0399 | 3.49E-05 |
| 11 | 61961938  | rs7926905   | A | G | 0.02   | 0.9568 | 0.4274  | 0.1027 | 3.50E-05 |
| 22 | 36643986  | rs35150149  | T | A | 0.21   | 0.9612 | 0.1468  | 0.0353 | 3.59E-05 |
| 7  | 87061534  | rs6977739   | T | G | 0.0731 | 0.9838 | 0.2283  | 0.055  | 3.60E-05 |
| 7  | 87056011  | rs1017054   | C | T | 0.073  | 0.9848 | 0.2283  | 0.055  | 3.60E-05 |
| 11 | 14251440  | rs61883840  | A | G | 0.2056 | 0.9898 | -0.1465 | 0.0353 | 3.62E-05 |
| 16 | 65794420  | rs58827016  | A | C | 0.092  | 0.9785 | 0.2051  | 0.0494 | 3.62E-05 |
| 5  | 159364062 | rs78695043  | C | A | 0.0415 | 0.9764 | 0.2974  | 0.0716 | 3.62E-05 |
| 13 | 45263685  | rs7331853   | C | A | 0.3794 | 1.0189 | -0.1201 | 0.0289 | 3.62E-05 |
| 4  | 10194377  | rs76850735  | C | T | 0.0252 | 0.9464 | 0.3847  | 0.0927 | 3.63E-05 |
| 5  | 159363996 | rs76342362  | C | A | 0.0415 | 0.9764 | 0.2974  | 0.0716 | 3.63E-05 |
| 9  | 135209595 | rs137935435 | T | G | 0.0171 | 0.7709 | 0.5155  | 0.1242 | 3.65E-05 |
| 5  | 159362973 | rs80043756  | C | T | 0.0415 | 0.9768 | 0.2972  | 0.0716 | 3.67E-05 |
| 9  | 135207272 | rs149838860 | G | A | 0.0171 | 0.7695 | 0.5161  | 0.1244 | 3.69E-05 |
| 3  | 151438811 | rs75124309  | A | C | 0.0361 | 0.9938 | 0.3169  | 0.0764 | 3.70E-05 |
| 5  | 159362184 | rs76615609  | C | T | 0.0415 | 0.977  | 0.297   | 0.0716 | 3.71E-05 |
| 3  | 150670866 | rs60340247  | T | C | 0.0137 | 0.9143 | 0.5444  | 0.1313 | 3.71E-05 |
| 5  | 159361847 | rs114842646 | A | G | 0.0415 | 0.9769 | 0.2969  | 0.0716 | 3.73E-05 |
| 12 | 114396307 | rs73401074  | C | T | 0.1224 | 1.0136 | 0.1776  | 0.0429 | 3.74E-05 |
| 2  | 102722402 | rs13388182  | T | C | 0.3209 | 0.9856 | -0.1277 | 0.0308 | 3.79E-05 |
| 2  | 102722402 | rs13388182  | T | C | 0.3209 | 0.9856 | -0.1277 | 0.0308 | 3.79E-05 |
| 17 | 3600433   | rs117973460 | T | C | 0.1625 | 0.8853 | 0.168   | 0.0406 | 3.79E-05 |

|    |           |             |   |   |        |        |         |        |          |
|----|-----------|-------------|---|---|--------|--------|---------|--------|----------|
| 22 | 36644151  | rs35345680  | A | G | 0.2103 | 0.9594 | 0.1464  | 0.0353 | 3.79E-05 |
| 17 | 71127132  | rs8075806   | C | A | 0.1809 | 0.9695 | -0.1539 | 0.0372 | 3.80E-05 |
| 9  | 23714264  | rs113488840 | G | A | 0.015  | 1.0019 | 0.4798  | 0.1159 | 3.83E-05 |
| 18 | 58821028  | rs117766488 | A | G | 0.0205 | 0.8271 | 0.4524  | 0.1093 | 3.84E-05 |
| 5  | 142432311 | rs62374604  | A | C | 0.0226 | 1.0196 | 0.3897  | 0.0942 | 3.86E-05 |
| 8  | 1275473   | rs73170458  | G | C | 0.0237 | 1.0336 | -0.3775 | 0.0913 | 3.87E-05 |
| 22 | 36644251  | rs35769663  | A | G | 0.2108 | 0.9595 | 0.1461  | 0.0353 | 3.87E-05 |
| 13 | 93652913  | rs308231    | T | C | 0.8849 | 0.9413 | -0.1886 | 0.0456 | 3.90E-05 |
| 10 | 8647358   | rs72777027  | T | C | 0.0247 | 1.0013 | 0.3754  | 0.0908 | 3.92E-05 |
| 8  | 104423011 | rs118081385 | A | G | 0.0146 | 0.9491 | 0.5024  | 0.1216 | 3.92E-05 |
| 2  | 102712236 | rs56193008  | A | G | 0.3183 | 0.9757 | -0.1283 | 0.031  | 3.93E-05 |
| 2  | 102712236 | rs56193008  | A | G | 0.3183 | 0.9757 | -0.1283 | 0.031  | 3.93E-05 |
| 5  | 116483701 | rs35928434  | T | C | 0.0179 | 0.8694 | -0.4707 | 0.1139 | 3.93E-05 |
| 13 | 93653818  | rs308236    | T | C | 0.885  | 0.9419 | -0.1884 | 0.0456 | 3.94E-05 |
| 7  | 87056176  | rs2230028   | C | T | 0.0733 | 0.9864 | 0.2267  | 0.0549 | 3.94E-05 |
| 13 | 93654114  | rs308237    | T | C | 0.885  | 0.9422 | -0.1884 | 0.0456 | 3.97E-05 |
| 4  | 10090931  | rs3775931   | T | C | 0.0823 | 0.9785 | 0.2146  | 0.052  | 3.97E-05 |
| 13 | 93654272  | rs170103    | G | A | 0.8851 | 0.9425 | -0.1883 | 0.0456 | 3.98E-05 |
| 13 | 93654351  | rs308238    | C | A | 0.8851 | 0.9427 | -0.1883 | 0.0456 | 3.98E-05 |
| 6  | 45820214  | rs142310373 | G | A | 0.0289 | 0.9226 | 0.362   | 0.0877 | 3.99E-05 |
| 13 | 29326727  | rs9508131   | A | G | 0.462  | 1.015  | -0.1159 | 0.0281 | 4.00E-05 |
| 2  | 102711009 | rs933494    | A | G | 0.318  | 0.979  | -0.1279 | 0.031  | 4.03E-05 |
| 2  | 102711009 | rs933494    | A | G | 0.318  | 0.979  | -0.1279 | 0.031  | 4.03E-05 |
| 18 | 47335627  | rs138571974 | T | C | 0.0643 | 0.9404 | 0.2443  | 0.0592 | 4.04E-05 |
| 10 | 104296419 | rs78657278  | G | T | 0.11   | 0.9315 | 0.1929  | 0.0467 | 4.04E-05 |
| 10 | 104296418 | rs79159857  | G | C | 0.11   | 0.9316 | 0.1929  | 0.0467 | 4.04E-05 |
| 13 | 93655194  | rs308239    | T | C | 0.8852 | 0.9436 | -0.1881 | 0.0456 | 4.04E-05 |
| 13 | 29326036  | rs12184861  | T | G | 0.4621 | 1.0154 | -0.1158 | 0.0281 | 4.04E-05 |
| 5  | 142431653 | rs7727861   | G | A | 0.0226 | 1.0189 | 0.389   | 0.0943 | 4.05E-05 |
| 13 | 29325932  | rs12184835  | T | C | 0.462  | 1.0157 | -0.1158 | 0.0281 | 4.06E-05 |

|    |           |             |   |   |        |        |         |        |          |
|----|-----------|-------------|---|---|--------|--------|---------|--------|----------|
| 13 | 29325914  | rs12184834  | T | C | 0.4621 | 1.0158 | -0.1158 | 0.0281 | 4.06E-05 |
| 13 | 93655620  | rs308240    | G | T | 0.8852 | 0.944  | -0.1881 | 0.0456 | 4.06E-05 |
| 13 | 93655647  | rs308241    | T | C | 0.8852 | 0.9442 | -0.188  | 0.0456 | 4.08E-05 |
| 13 | 93655675  | rs308242    | A | G | 0.8852 | 0.9443 | -0.188  | 0.0456 | 4.08E-05 |
| 13 | 93655803  | rs308243    | G | A | 0.8853 | 0.9445 | -0.188  | 0.0456 | 4.09E-05 |
| 13 | 22713611  | rs4769203   | T | C | 0.8052 | 0.8349 | 0.1614  | 0.0392 | 4.09E-05 |
| 13 | 93655843  | rs308244    | A | C | 0.8853 | 0.9446 | -0.188  | 0.0456 | 4.10E-05 |
| 13 | 93656075  | rs308246    | T | C | 0.8853 | 0.9453 | -0.1879 | 0.0456 | 4.12E-05 |
| 17 | 71154910  | rs2044718   | A | C | 0.2019 | 0.9764 | -0.1462 | 0.0355 | 4.14E-05 |
| 8  | 104462801 | rs117575603 | C | T | 0.0147 | 0.9253 | 0.5041  | 0.1223 | 4.14E-05 |
| 13 | 93656534  | rs308247    | C | T | 0.8854 | 0.9462 | -0.1877 | 0.0456 | 4.18E-05 |
| 13 | 93656633  | rs457190    | C | T | 0.8854 | 0.9465 | -0.1876 | 0.0456 | 4.20E-05 |
| 13 | 93656800  | rs308248    | T | C | 0.8855 | 0.947  | -0.1875 | 0.0456 | 4.22E-05 |
| 2  | 58086587  | rs78703671  | C | A | 0.0177 | 0.9039 | 0.4636  | 0.1127 | 4.23E-05 |
| 2  | 58086587  | rs78703671  | C | A | 0.0177 | 0.9039 | 0.4636  | 0.1127 | 4.23E-05 |
| 13 | 93657064  | rs167390    | A | T | 0.8855 | 0.9472 | -0.1875 | 0.0456 | 4.24E-05 |
| 13 | 29324426  | rs9579229   | T | A | 0.4624 | 1.0177 | -0.1154 | 0.028  | 4.25E-05 |
| 13 | 29324203  | rs9579228   | G | A | 0.4624 | 1.018  | -0.1153 | 0.028  | 4.27E-05 |
| 17 | 37196446  | rs55646995  | T | C | 0.0288 | 1.0263 | 0.3432  | 0.0834 | 4.28E-05 |
| 13 | 93657160  | rs160147    | A | T | 0.8855 | 0.9475 | -0.1874 | 0.0456 | 4.28E-05 |
| 13 | 93657855  | rs401043    | C | G | 0.8856 | 0.9481 | -0.1873 | 0.0456 | 4.29E-05 |
| 13 | 93657860  | rs400535    | A | C | 0.8856 | 0.9482 | -0.1873 | 0.0456 | 4.29E-05 |
| 12 | 48775764  | rs10783249  | C | T | 0.2633 | 0.9825 | 0.1321  | 0.0321 | 4.30E-05 |
| 13 | 93658331  | rs160135    | T | G | 0.8856 | 0.9492 | -0.1872 | 0.0455 | 4.33E-05 |
| 2  | 18435253  | rs140060408 | G | T | 0.0172 | 1.0478 | -0.4355 | 0.106  | 4.33E-05 |
| 2  | 18435253  | rs140060408 | G | T | 0.0172 | 1.0478 | -0.4355 | 0.106  | 4.33E-05 |
| 13 | 93658420  | rs160136    | G | A | 0.8856 | 0.9493 | -0.1872 | 0.0455 | 4.33E-05 |
| 13 | 93658505  | rs160137    | C | T | 0.8857 | 0.9497 | -0.1871 | 0.0455 | 4.35E-05 |
| 2  | 18459672  | rs141660103 | C | T | 0.0172 | 1.0473 | -0.4355 | 0.106  | 4.35E-05 |
| 2  | 18459672  | rs141660103 | C | T | 0.0172 | 1.0473 | -0.4355 | 0.106  | 4.35E-05 |

|    |           |             |   |   |        |        |         |        |          |
|----|-----------|-------------|---|---|--------|--------|---------|--------|----------|
| 2  | 18435641  | rs12467096  | G | C | 0.0172 | 1.0475 | -0.4355 | 0.106  | 4.35E-05 |
| 2  | 18435641  | rs12467096  | G | C | 0.0172 | 1.0475 | -0.4355 | 0.106  | 4.35E-05 |
| 2  | 18459610  | rs114366824 | A | C | 0.0172 | 1.0476 | -0.4355 | 0.106  | 4.35E-05 |
| 2  | 18459610  | rs114366824 | A | C | 0.0172 | 1.0476 | -0.4355 | 0.106  | 4.35E-05 |
| 2  | 102713621 | rs72817889  | T | C | 0.3181 | 0.9755 | -0.1276 | 0.0311 | 4.36E-05 |
| 2  | 102713621 | rs72817889  | T | C | 0.3181 | 0.9755 | -0.1276 | 0.0311 | 4.36E-05 |
| 20 | 44474810  | rs197664    | T | C | 0.0272 | 0.9435 | 0.3659  | 0.0891 | 4.38E-05 |
| 2  | 18442302  | rs146749043 | G | A | 0.0172 | 1.0466 | -0.4355 | 0.106  | 4.38E-05 |
| 2  | 18442302  | rs146749043 | G | A | 0.0172 | 1.0466 | -0.4355 | 0.106  | 4.38E-05 |
| 13 | 93658638  | rs160138    | T | C | 0.8857 | 0.95   | -0.187  | 0.0455 | 4.38E-05 |
| 13 | 29319116  | rs7338057   | T | C | 0.4543 | 1.0193 | -0.1152 | 0.0281 | 4.40E-05 |
| 5  | 11381876  | rs188888729 | G | A | 0.0122 | 0.9248 | 0.5497  | 0.1339 | 4.40E-05 |
| 2  | 18439607  | rs115539892 | A | C | 0.0172 | 1.0471 | -0.4352 | 0.106  | 4.40E-05 |
| 2  | 18439607  | rs115539892 | A | C | 0.0172 | 1.0471 | -0.4352 | 0.106  | 4.40E-05 |
| 11 | 14251553  | rs4757243   | A | G | 0.2054 | 0.9853 | -0.1453 | 0.0354 | 4.40E-05 |
| 13 | 29319711  | rs7339280   | A | C | 0.4543 | 1.0196 | -0.1151 | 0.028  | 4.41E-05 |
| 8  | 22820753  | rs113286888 | C | G | 0.0162 | 0.8492 | 0.5018  | 0.1223 | 4.46E-05 |
| 2  | 2066677   | rs756282    | G | T | 0.3884 | 0.9523 | 0.1221  | 0.0298 | 4.49E-05 |
| 2  | 2066677   | rs756282    | G | T | 0.3884 | 0.9523 | 0.1221  | 0.0298 | 4.49E-05 |
| 14 | 73466566  | rs10138746  | C | G | 0.0302 | 1.0372 | 0.3336  | 0.0814 | 4.51E-05 |
| 7  | 157927316 | rs6943714   | G | A | 0.326  | 0.9757 | 0.1247  | 0.0304 | 4.51E-05 |
| 2  | 177005519 | rs79120932  | T | G | 0.0128 | 0.9857 | 0.5219  | 0.1273 | 4.51E-05 |
| 2  | 177005519 | rs79120932  | T | G | 0.0128 | 0.9857 | 0.5219  | 0.1273 | 4.51E-05 |
| 19 | 50821781  | rs28479615  | C | T | 0.0856 | 0.9334 | -0.2152 | 0.0525 | 4.52E-05 |
| 7  | 87052479  | rs6977539   | C | T | 0.0694 | 0.9942 | 0.2296  | 0.056  | 4.52E-05 |
| 7  | 87052605  | rs6957680   | G | A | 0.0694 | 0.9942 | 0.2296  | 0.056  | 4.52E-05 |
| 13 | 29323164  | rs1928502   | T | C | 0.4626 | 1.0197 | -0.1148 | 0.028  | 4.52E-05 |
| 2  | 102714540 | rs11685997  | T | C | 0.3178 | 0.9766 | -0.1273 | 0.0311 | 4.54E-05 |
| 2  | 102714540 | rs11685997  | T | C | 0.3178 | 0.9766 | -0.1273 | 0.0311 | 4.54E-05 |
| 5  | 10109385  | rs906071    | C | T | 0.2794 | 0.9657 | 0.1313  | 0.032  | 4.55E-05 |

|    |           |             |   |   |        |        |         |        |          |
|----|-----------|-------------|---|---|--------|--------|---------|--------|----------|
| 20 | 31861671  | rs6141908   | G | C | 0.2224 | 0.9811 | 0.1406  | 0.0343 | 4.55E-05 |
| 16 | 9677797   | rs12444198  | T | A | 0.1454 | 0.9927 | 0.1645  | 0.0401 | 4.58E-05 |
| 13 | 93660312  | rs172590    | A | G | 0.8859 | 0.9542 | -0.1863 | 0.0455 | 4.60E-05 |
| 21 | 39223881  | rs12483485  | T | C | 0.033  | 1.0158 | 0.321   | 0.0784 | 4.60E-05 |
| 7  | 87053611  | rs45609336  | C | G | 0.0694 | 0.9933 | 0.2293  | 0.056  | 4.61E-05 |
| 4  | 112335436 | rs114307289 | A | C | 0.0108 | 0.9627 | -0.5698 | 0.1392 | 4.62E-05 |
| 13 | 29316654  | rs9314917   | G | A | 0.4549 | 1.018  | -0.1149 | 0.0281 | 4.64E-05 |
| 13 | 29319840  | rs1928501   | T | C | 0.4627 | 1.02   | -0.1146 | 0.028  | 4.70E-05 |
| 13 | 29319871  | rs7139542   | T | C | 0.4627 | 1.0201 | -0.1145 | 0.028  | 4.70E-05 |
| 13 | 29320287  | rs7324361   | A | G | 0.4626 | 1.0201 | -0.1145 | 0.028  | 4.72E-05 |
| 1  | 59530164  | rs12016651  | A | G | 0.2319 | 0.9833 | -0.1383 | 0.0338 | 4.73E-05 |
| 13 | 93652425  | rs308230    | G | A | 0.8792 | 0.9243 | -0.1843 | 0.0451 | 4.73E-05 |
| 13 | 29320286  | rs7325403   | C | T | 0.4626 | 1.02   | -0.1145 | 0.028  | 4.73E-05 |
| 20 | 31874257  | rs3827028   | G | A | 0.2694 | 0.9314 | 0.1346  | 0.0329 | 4.74E-05 |
| 7  | 157928817 | rs7799902   | A | G | 0.3194 | 0.9706 | 0.1252  | 0.0306 | 4.78E-05 |
| 13 | 29320084  | rs7323963   | C | G | 0.4627 | 1.0207 | -0.1144 | 0.028  | 4.78E-05 |
| 13 | 29314645  | rs9508125   | A | G | 0.5381 | 1.014  | 0.1147  | 0.0281 | 4.78E-05 |
| 13 | 29320342  | rs7324041   | G | A | 0.4628 | 1.0213 | -0.1143 | 0.028  | 4.80E-05 |
| 13 | 93652387  | rs308229    | C | A | 0.8792 | 0.924  | -0.1842 | 0.0451 | 4.81E-05 |
| 13 | 93662149  | rs160140    | G | A | 0.8862 | 0.9581 | -0.1855 | 0.0454 | 4.81E-05 |
| 13 | 29320935  | rs1539056   | G | A | 0.4628 | 1.0223 | -0.1143 | 0.028  | 4.81E-05 |
| 13 | 29320883  | rs1539057   | A | G | 0.4628 | 1.0223 | -0.1143 | 0.028  | 4.82E-05 |
| 10 | 107638257 | rs17236454  | G | T | 0.021  | 0.8569 | 0.437   | 0.107  | 4.82E-05 |
| 11 | 65635559  | rs594689    | A | G | 0.5198 | 0.9932 | -0.1156 | 0.0283 | 4.84E-05 |
| 13 | 93662235  | rs160141    | C | T | 0.8862 | 0.9585 | -0.1854 | 0.0454 | 4.84E-05 |
| 18 | 47318473  | rs17713584  | C | G | 0.0577 | 0.9526 | 0.2536  | 0.0621 | 4.84E-05 |
| 2  | 64364632  | rs6733160   | C | T | 0.5338 | 0.9962 | -0.1159 | 0.0284 | 4.85E-05 |
| 2  | 64364632  | rs6733160   | C | T | 0.5338 | 0.9962 | -0.1159 | 0.0284 | 4.85E-05 |
| 8  | 22636936  | rs112910828 | A | T | 0.0155 | 0.8965 | 0.4984  | 0.1221 | 4.85E-05 |
| 19 | 40038334  | rs143814327 | A | G | 0.0142 | 0.9582 | 0.4987  | 0.1222 | 4.86E-05 |

|    |           |             |   |   |        |        |         |        |          |
|----|-----------|-------------|---|---|--------|--------|---------|--------|----------|
| 20 | 31862280  | rs1964852   | T | C | 0.2752 | 0.9472 | 0.1325  | 0.0325 | 4.86E-05 |
| 2  | 64367694  | rs6730262   | T | C | 0.5338 | 0.9963 | -0.1159 | 0.0284 | 4.88E-05 |
| 2  | 64367694  | rs6730262   | T | C | 0.5338 | 0.9963 | -0.1159 | 0.0284 | 4.88E-05 |
| 3  | 43808049  | rs190927863 | C | G | 0.0104 | 1.0546 | 0.5547  | 0.1359 | 4.89E-05 |
| 13 | 93662748  | rs466561    | T | G | 0.8862 | 0.9596 | -0.1852 | 0.0454 | 4.91E-05 |
| 13 | 29314452  | rs9508124   | G | A | 0.5384 | 1.0159 | 0.1145  | 0.0281 | 4.91E-05 |
| 13 | 93662845  | rs462910    | C | T | 0.8862 | 0.9597 | -0.1852 | 0.0454 | 4.92E-05 |
| 13 | 93663635  | rs464563    | A | T | 0.8862 | 0.9597 | -0.1852 | 0.0454 | 4.92E-05 |
| 13 | 93663970  | rs460846    | C | T | 0.8862 | 0.9597 | -0.1852 | 0.0454 | 4.92E-05 |
| 13 | 93664425  | rs445462    | T | C | 0.8862 | 0.9597 | -0.1852 | 0.0454 | 4.92E-05 |
| 13 | 93664775  | rs452880    | G | C | 0.8862 | 0.9597 | -0.1852 | 0.0454 | 4.92E-05 |
| 13 | 93664954  | rs399314    | G | A | 0.8862 | 0.9597 | -0.1852 | 0.0454 | 4.92E-05 |
| 2  | 8030276   | rs17838382  | C | T | 0.0164 | 0.9597 | 0.4643  | 0.1138 | 4.92E-05 |
| 2  | 8030276   | rs17838382  | C | T | 0.0164 | 0.9597 | 0.4643  | 0.1138 | 4.92E-05 |
| 13 | 93663210  | rs463719    | G | A | 0.8862 | 0.9596 | -0.1852 | 0.0454 | 4.92E-05 |
| 2  | 2031036   | rs1213579   | C | T | 0.3539 | 0.9506 | 0.1239  | 0.0304 | 4.92E-05 |
| 2  | 2031036   | rs1213579   | C | T | 0.3539 | 0.9506 | 0.1239  | 0.0304 | 4.92E-05 |
| 5  | 159308481 | rs116749599 | T | C | 0.0159 | 0.9497 | 0.4722  | 0.1158 | 4.93E-05 |
| 2  | 2007981   | rs68087472  | A | G | 0.3665 | 0.9505 | 0.1231  | 0.0302 | 4.93E-05 |
| 2  | 2007981   | rs68087472  | A | G | 0.3665 | 0.9505 | 0.1231  | 0.0302 | 4.93E-05 |
| 13 | 93665488  | rs374894    | A | T | 0.8862 | 0.9597 | -0.1851 | 0.0454 | 4.96E-05 |
| 13 | 93665712  | rs405994    | C | T | 0.8862 | 0.9596 | -0.1851 | 0.0454 | 4.98E-05 |
| 13 | 93665835  | rs424228    | T | C | 0.8862 | 0.9596 | -0.185  | 0.0454 | 4.99E-05 |
| 2  | 102725013 | rs17767183  | T | C | 0.3179 | 0.9759 | -0.1267 | 0.0311 | 5.00E-05 |
| 2  | 102725013 | rs17767183  | T | C | 0.3179 | 0.9759 | -0.1267 | 0.0311 | 5.00E-05 |
| 13 | 29316836  | rs9314918   | A | G | 0.4548 | 1.0187 | -0.1143 | 0.028  | 5.00E-05 |
| 13 | 93665860  | rs374048    | T | C | 0.8862 | 0.9596 | -0.185  | 0.0454 | 5.00E-05 |
| 13 | 93665924  | rs447741    | G | C | 0.8862 | 0.9596 | -0.185  | 0.0454 | 5.01E-05 |
| 13 | 29315831  | rs9506037   | T | C | 0.4552 | 1.0223 | -0.1141 | 0.028  | 5.02E-05 |
| 13 | 93665955  | rs451715    | T | G | 0.8862 | 0.9596 | -0.185  | 0.0454 | 5.02E-05 |

|    |           |             |   |   |        |        |         |        |          |
|----|-----------|-------------|---|---|--------|--------|---------|--------|----------|
| 16 | 68255037  | rs145240988 | G | T | 0.0123 | 0.9234 | 0.5449  | 0.1337 | 5.02E-05 |
| 12 | 114396345 | rs73401076  | C | A | 0.1198 | 1.021  | 0.1758  | 0.0432 | 5.03E-05 |
| 5  | 167458946 | rs13158058  | T | G | 0.4063 | 0.9251 | -0.1229 | 0.0302 | 5.06E-05 |
| 2  | 102718225 | rs17818195  | C | T | 0.3179 | 0.9737 | -0.1267 | 0.0311 | 5.06E-05 |
| 2  | 102718225 | rs17818195  | C | T | 0.3179 | 0.9737 | -0.1267 | 0.0311 | 5.06E-05 |
| 12 | 114388301 | rs3816579   | G | A | 0.1199 | 1.0216 | 0.1757  | 0.0431 | 5.08E-05 |
| 12 | 114389242 | rs10850253  | C | T | 0.1199 | 1.0216 | 0.1757  | 0.0431 | 5.08E-05 |
| 13 | 93666328  | rs462792    | T | C | 0.8863 | 0.9595 | -0.1849 | 0.0454 | 5.09E-05 |
| 13 | 29321378  | rs9508128   | G | T | 0.4626 | 1.0204 | -0.114  | 0.028  | 5.12E-05 |
| 12 | 106335822 | rs75404309  | T | A | 0.0459 | 0.8534 | 0.2983  | 0.0733 | 5.12E-05 |
| 13 | 93666857  | rs467354    | G | A | 0.8863 | 0.9595 | -0.1848 | 0.0454 | 5.13E-05 |
| 1  | 192355216 | rs10159276  | C | G | 0.2819 | 0.9868 | -0.1292 | 0.0318 | 5.14E-05 |
| 13 | 29316991  | rs9314919   | C | G | 0.4544 | 1.0188 | -0.1141 | 0.0281 | 5.18E-05 |
| 13 | 29316941  | rs9506039   | C | T | 0.4544 | 1.0187 | -0.1141 | 0.0281 | 5.18E-05 |
| 2  | 177008484 | rs79440139  | A | T | 0.0134 | 0.9784 | 0.5063  | 0.1245 | 5.20E-05 |
| 2  | 177008484 | rs79440139  | A | T | 0.0134 | 0.9784 | 0.5063  | 0.1245 | 5.20E-05 |
| 2  | 84184053  | rs116366566 | T | C | 0.0123 | 0.9375 | 0.538   | 0.1323 | 5.20E-05 |
| 2  | 84184053  | rs116366566 | T | C | 0.0123 | 0.9375 | 0.538   | 0.1323 | 5.20E-05 |
| 9  | 26698957  | rs142256843 | T | C | 0.012  | 0.9436 | 0.5438  | 0.1337 | 5.21E-05 |
| 9  | 76909652  | rs11143897  | G | T | 0.1538 | 1.043  | -0.1565 | 0.0385 | 5.21E-05 |
| 2  | 64369336  | rs10496107  | C | A | 0.5333 | 0.9988 | -0.1152 | 0.0283 | 5.22E-05 |
| 2  | 64369336  | rs10496107  | C | A | 0.5333 | 0.9988 | -0.1152 | 0.0283 | 5.22E-05 |
| 14 | 73462076  | rs4903085   | G | A | 0.0304 | 1.0324 | 0.3306  | 0.0813 | 5.22E-05 |
| 12 | 106233178 | rs10861522  | C | T | 0.3458 | 1.0646 | 0.1172  | 0.0288 | 5.23E-05 |
| 13 | 113207608 | rs76588804  | A | C | 0.0164 | 0.8344 | 0.4921  | 0.1211 | 5.23E-05 |
| 3  | 131415723 | rs75119553  | C | T | 0.0473 | 0.9271 | 0.28    | 0.0689 | 5.24E-05 |
| 20 | 31874869  | rs6119362   | A | C | 0.2742 | 0.9369 | 0.1326  | 0.0326 | 5.28E-05 |
| 21 | 39223696  | rs12483570  | C | T | 0.0332 | 1.0203 | 0.3167  | 0.078  | 5.32E-05 |
| 2  | 102719104 | rs72996520  | T | C | 0.3175 | 0.9756 | -0.1263 | 0.0311 | 5.32E-05 |
| 2  | 102719104 | rs72996520  | T | C | 0.3175 | 0.9756 | -0.1263 | 0.0311 | 5.32E-05 |



|    |           |             |   |   |        |        |         |        |          |
|----|-----------|-------------|---|---|--------|--------|---------|--------|----------|
| 8  | 22818529  | rs2872346   | C | A | 0.2849 | 0.9604 | -0.1297 | 0.0319 | 5.32E-05 |
| 13 | 93668983  | rs191044    | T | A | 0.8863 | 0.9593 | -0.1844 | 0.0454 | 5.34E-05 |
| 13 | 93669289  | rs160150    | T | C | 0.8863 | 0.9593 | -0.1844 | 0.0454 | 5.36E-05 |
| 20 | 31867032  | rs6059230   | T | C | 0.2753 | 0.9455 | 0.1319  | 0.0325 | 5.36E-05 |
| 5  | 16858282  | rs2625206   | C | T | 0.3119 | 0.9526 | -0.1269 | 0.0313 | 5.36E-05 |
| 3  | 116193370 | rs143848409 | T | C | 0.0171 | 1.0078 | 0.4404  | 0.1085 | 5.39E-05 |
| 20 | 31867840  | rs941682    | G | A | 0.2756 | 0.9465 | 0.1317  | 0.0325 | 5.40E-05 |
| 18 | 3114419   | rs11081010  | A | G | 0.8943 | 0.9678 | 0.1898  | 0.0468 | 5.40E-05 |
| 2  | 102721117 | rs1019296   | C | T | 0.3177 | 0.9759 | -0.1261 | 0.0311 | 5.43E-05 |
| 2  | 102721117 | rs1019296   | C | T | 0.3177 | 0.9759 | -0.1261 | 0.0311 | 5.43E-05 |
| 14 | 81561209  | rs117631391 | G | A | 0.024  | 0.849  | -0.4065 | 0.1002 | 5.43E-05 |
| 4  | 10082515  | rs737678    | T | C | 0.0684 | 0.9774 | 0.2302  | 0.0568 | 5.45E-05 |
| 1  | 192351359 | rs7549244   | A | T | 0.2817 | 0.9726 | -0.1297 | 0.032  | 5.49E-05 |
| 17 | 71132748  | rs62071582  | C | A | 0.1836 | 1.021  | -0.1461 | 0.0361 | 5.52E-05 |
| 15 | 32088895  | rs117740173 | T | C | 0.0117 | 0.8738 | 0.5677  | 0.1401 | 5.52E-05 |
| 5  | 55142537  | rs10737957  | A | C | 0.7023 | 0.9255 | 0.131   | 0.0323 | 5.55E-05 |
| 16 | 65830216  | rs1118653   | C | G | 0.1057 | 0.9816 | 0.1879  | 0.0464 | 5.55E-05 |
| 17 | 71153739  | rs9906459   | T | C | 0.1941 | 0.9743 | -0.1462 | 0.0361 | 5.58E-05 |
| 20 | 31859395  | rs1884883   | C | T | 0.2232 | 0.9798 | 0.1388  | 0.0343 | 5.60E-05 |
| 9  | 113931440 | rs183439396 | A | G | 0.0107 | 0.7941 | 0.6248  | 0.1543 | 5.61E-05 |
| 3  | 153366389 | rs116429691 | T | C | 0.0161 | 0.8771 | 0.4882  | 0.1206 | 5.61E-05 |
| 22 | 42949748  | rs3213548   | G | C | 0.2455 | 0.8275 | -0.1458 | 0.036  | 5.61E-05 |
| 2  | 102717337 | rs10490571  | T | C | 0.318  | 0.979  | -0.1256 | 0.031  | 5.62E-05 |
| 2  | 102717337 | rs10490571  | T | C | 0.318  | 0.979  | -0.1256 | 0.031  | 5.62E-05 |
| 20 | 31854547  | rs6141379   | T | C | 0.2231 | 0.9793 | 0.1389  | 0.0343 | 5.63E-05 |
| 11 | 61964425  | rs17577608  | T | C | 0.0208 | 0.9505 | 0.41    | 0.1013 | 5.64E-05 |
| 9  | 24911447  | rs75221401  | G | A | 0.028  | 0.8022 | -0.3872 | 0.0957 | 5.66E-05 |
| 17 | 71133864  | rs12602530  | T | A | 0.1837 | 1.0245 | -0.1456 | 0.036  | 5.67E-05 |
| 13 | 93673083  | rs308253    | C | G | 0.8863 | 0.9591 | -0.1838 | 0.0454 | 5.69E-05 |
| 21 | 37550509  | rs2845753   | C | G | 0.3277 | 0.9854 | -0.1229 | 0.0304 | 5.70E-05 |

|    |           |             |   |   |        |        |         |        |          |
|----|-----------|-------------|---|---|--------|--------|---------|--------|----------|
| 14 | 73468970  | rs12323834  | A | G | 0.0294 | 1.0474 | 0.3315  | 0.082  | 5.72E-05 |
| 2  | 102728716 | rs1861283   | T | C | 0.3272 | 0.9706 | -0.1249 | 0.0309 | 5.72E-05 |
| 2  | 102728716 | rs1861283   | T | C | 0.3272 | 0.9706 | -0.1249 | 0.0309 | 5.72E-05 |
| 10 | 35556466  | rs79940628  | G | A | 0.0162 | 0.8953 | 0.4775  | 0.1181 | 5.77E-05 |
| 2  | 241170677 | rs147288234 | A | G | 0.0182 | 0.8209 | 0.4706  | 0.1165 | 5.79E-05 |
| 2  | 241170677 | rs147288234 | A | G | 0.0182 | 0.8209 | 0.4706  | 0.1165 | 5.79E-05 |
| 13 | 93673921  | rs184254    | G | C | 0.8863 | 0.959  | -0.1836 | 0.0454 | 5.79E-05 |
| 7  | 87055635  | rs11768699  | T | G | 0.0699 | 0.9931 | 0.2255  | 0.0558 | 5.80E-05 |
| 7  | 87057699  | rs6956661   | A | G | 0.0699 | 0.9931 | 0.2255  | 0.0558 | 5.80E-05 |
| 17 | 3556471   | rs188118937 | T | C | 0.0135 | 0.886  | 0.5238  | 0.1297 | 5.80E-05 |
| 12 | 114396518 | rs73401078  | T | G | 0.1193 | 1.0222 | 0.1744  | 0.0432 | 5.86E-05 |
| 2  | 223645982 | rs74367692  | T | A | 0.0509 | 0.7511 | -0.2986 | 0.074  | 5.86E-05 |
| 2  | 223645982 | rs74367692  | T | A | 0.0509 | 0.7511 | -0.2986 | 0.074  | 5.86E-05 |
| 1  | 192351321 | rs12143695  | C | T | 0.2814 | 0.9707 | -0.1294 | 0.0321 | 5.87E-05 |
| 6  | 148104634 | rs12664057  | G | A | 0.0802 | 0.9385 | 0.2168  | 0.0537 | 5.88E-05 |
| 2  | 241170675 | rs113694575 | C | T | 0.0184 | 0.8167 | 0.4699  | 0.1164 | 5.89E-05 |
| 2  | 241170675 | rs113694575 | C | T | 0.0184 | 0.8167 | 0.4699  | 0.1164 | 5.89E-05 |
| 7  | 87058570  | rs45466200  | T | G | 0.0699 | 0.9925 | 0.2254  | 0.0558 | 5.90E-05 |
| 6  | 166331331 | rs12528241  | A | G | 0.0601 | 0.9896 | 0.2429  | 0.0602 | 5.99E-05 |
| 7  | 157888228 | rs9654673   | C | G | 0.3241 | 0.9403 | 0.125   | 0.031  | 6.00E-05 |
| 7  | 87059700  | rs45474405  | A | G | 0.0699 | 0.9919 | 0.2252  | 0.0559 | 6.02E-05 |
| 10 | 104493444 | rs11191381  | T | C | 0.3174 | 0.9499 | 0.1253  | 0.0311 | 6.05E-05 |
| 2  | 177008161 | rs148638470 | T | C | 0.0127 | 0.973  | 0.5175  | 0.1284 | 6.06E-05 |
| 2  | 177008161 | rs148638470 | T | C | 0.0127 | 0.973  | 0.5175  | 0.1284 | 6.06E-05 |
| 19 | 40027464  | rs117900938 | G | A | 0.0221 | 1.0299 | 0.3826  | 0.0949 | 6.06E-05 |
| 2  | 8022943   | rs61235986  | A | G | 0.0145 | 0.9902 | 0.4797  | 0.1191 | 6.07E-05 |
| 2  | 8022943   | rs61235986  | A | G | 0.0145 | 0.9902 | 0.4797  | 0.1191 | 6.07E-05 |
| 12 | 114381499 | rs73399070  | A | G | 0.1043 | 0.9782 | 0.1887  | 0.0468 | 6.08E-05 |
| 2  | 8023073   | rs6721147   | A | C | 0.0145 | 0.9899 | 0.4798  | 0.1191 | 6.09E-05 |
| 2  | 8023073   | rs6721147   | A | C | 0.0145 | 0.9899 | 0.4798  | 0.1191 | 6.09E-05 |

|    |           |             |   |   |        |        |         |        |          |
|----|-----------|-------------|---|---|--------|--------|---------|--------|----------|
| 22 | 26517670  | rs139445921 | A | G | 0.0141 | 0.8302 | 0.5295  | 0.1314 | 6.09E-05 |
| 22 | 36644522  | rs35829971  | T | C | 0.2103 | 0.961  | 0.1423  | 0.0353 | 6.12E-05 |
| 14 | 73456238  | rs28609654  | C | T | 0.0306 | 1.0296 | 0.3269  | 0.0812 | 6.14E-05 |
| 10 | 104266239 | rs113451617 | A | G | 0.2294 | 0.9408 | 0.1394  | 0.0346 | 6.21E-05 |
| 8  | 84195830  | rs143117419 | A | T | 0.0133 | 0.8172 | 0.5477  | 0.1362 | 6.24E-05 |
| 7  | 87061753  | rs45547639  | T | G | 0.0699 | 0.9909 | 0.2249  | 0.0559 | 6.26E-05 |
| 7  | 87061974  | rs45473093  | G | A | 0.0699 | 0.9909 | 0.2249  | 0.0559 | 6.27E-05 |
| 17 | 71142994  | rs7213907   | C | T | 0.7731 | 1.0224 | 0.1339  | 0.0333 | 6.27E-05 |
| 7  | 87062112  | rs1034821   | G | T | 0.0699 | 0.9909 | 0.2249  | 0.0559 | 6.28E-05 |
| 1  | 211732947 | rs6663436   | T | A | 0.8828 | 0.9624 | 0.1803  | 0.0448 | 6.29E-05 |
| 3  | 172572471 | rs1553176   | T | C | 0.1521 | 0.9012 | 0.1661  | 0.0413 | 6.34E-05 |
| 2  | 88418770  | rs74832257  | G | A | 0.0143 | 0.8651 | 0.5144  | 0.128  | 6.37E-05 |
| 2  | 88418770  | rs74832257  | G | A | 0.0143 | 0.8651 | 0.5144  | 0.128  | 6.37E-05 |
| 1  | 54852036  | rs151070537 | G | C | 0.0109 | 0.8592 | 0.5908  | 0.1471 | 6.38E-05 |
| 16 | 68316582  | rs139936925 | A | G | 0.0127 | 0.9253 | 0.5283  | 0.1315 | 6.39E-05 |
| 17 | 71143527  | rs10852744  | G | T | 0.7731 | 1.0213 | 0.1338  | 0.0333 | 6.40E-05 |
| 1  | 192351266 | rs12142904  | G | A | 0.2818 | 0.9728 | -0.1286 | 0.032  | 6.41E-05 |
| 7  | 87049583  | rs45540936  | G | C | 0.0741 | 0.9746 | 0.2209  | 0.055  | 6.42E-05 |
| 17 | 8290362   | rs112443430 | T | C | 0.0291 | 0.9514 | 0.3473  | 0.0865 | 6.44E-05 |
| 3  | 8806526   | rs115356575 | A | G | 0.0179 | 0.8575 | 0.4599  | 0.1145 | 6.44E-05 |
| 3  | 153381359 | rs147808876 | C | T | 0.011  | 0.8277 | 0.6012  | 0.1497 | 6.44E-05 |
| 7  | 96425603  | rs118081765 | C | T | 0.0147 | 0.9952 | 0.4723  | 0.1177 | 6.50E-05 |
| 13 | 29316482  | rs1792049   | G | A | 0.4582 | 1.0102 | -0.113  | 0.0282 | 6.51E-05 |
| 4  | 10082464  | rs4478188   | A | C | 0.0689 | 0.9763 | 0.2273  | 0.0567 | 6.51E-05 |
| 2  | 48012027  | rs3136239   | C | G | 0.0285 | 0.8533 | 0.369   | 0.092  | 6.55E-05 |
| 2  | 48012027  | rs3136239   | C | G | 0.0285 | 0.8533 | 0.369   | 0.092  | 6.55E-05 |
| 5  | 75233405  | rs11958971  | G | A | 0.4816 | 0.9723 | -0.1155 | 0.0288 | 6.63E-05 |
| 4  | 77869872  | rs75272931  | C | G | 0.0372 | 0.9125 | 0.3134  | 0.0782 | 6.63E-05 |
| 1  | 238772108 | rs61829290  | T | G | 0.0396 | 0.8882 | 0.3085  | 0.077  | 6.64E-05 |
| 1  | 91249095  | rs78851948  | T | C | 0.0248 | 0.8743 | 0.3884  | 0.0969 | 6.64E-05 |

|    |           |             |   |   |        |        |         |        |          |
|----|-----------|-------------|---|---|--------|--------|---------|--------|----------|
| 2  | 239463148 | rs6726956   | A | G | 0.321  | 1.006  | -0.122  | 0.0304 | 6.65E-05 |
| 2  | 239463148 | rs6726956   | A | G | 0.321  | 1.006  | -0.122  | 0.0304 | 6.65E-05 |
| 7  | 138733340 | rs11981663  | C | T | 0.0233 | 1.0177 | 0.3744  | 0.0934 | 6.68E-05 |
| 16 | 23743126  | rs117701014 | G | T | 0.0203 | 0.7901 | 0.4528  | 0.113  | 6.69E-05 |
| 14 | 73477629  | rs143319887 | C | T | 0.0285 | 1.0086 | 0.3393  | 0.0847 | 6.69E-05 |
| 11 | 14252728  | rs7951630   | G | T | 0.7978 | 0.9792 | 0.1434  | 0.0358 | 6.69E-05 |
| 5  | 75232389  | rs1357997   | G | A | 0.4814 | 0.9734 | -0.1154 | 0.0288 | 6.69E-05 |
| 5  | 159713955 | rs72812242  | C | A | 0.1001 | 0.8351 | -0.206  | 0.0514 | 6.71E-05 |
| 7  | 138733313 | rs11978040  | T | C | 0.0233 | 1.0182 | 0.3742  | 0.0934 | 6.73E-05 |
| 17 | 71136248  | rs9911292   | G | A | 0.1835 | 1.0319 | -0.1436 | 0.0359 | 6.75E-05 |
| 17 | 71135860  | rs55944075  | G | T | 0.1835 | 1.032  | -0.1436 | 0.0359 | 6.75E-05 |
| 17 | 71135791  | rs56053845  | A | G | 0.1835 | 1.0323 | -0.1436 | 0.0359 | 6.76E-05 |
| 17 | 71138465  | rs55739021  | A | T | 0.1834 | 1.0312 | -0.1436 | 0.0359 | 6.82E-05 |
| 17 | 71138696  | rs55832596  | A | G | 0.1833 | 1.0313 | -0.1436 | 0.0359 | 6.87E-05 |
| 10 | 104398895 | rs12764219  | T | G | 0.279  | 0.9799 | 0.1278  | 0.032  | 6.89E-05 |
| 9  | 135181695 | rs118172942 | A | G | 0.0346 | 0.8772 | 0.3337  | 0.0835 | 6.92E-05 |
| 6  | 78791379  | rs3904384   | A | C | 0.0426 | 0.9207 | 0.2929  | 0.0733 | 6.94E-05 |
| 13 | 93661677  | rs9301847   | C | T | 0.1111 | 0.9629 | 0.1829  | 0.0458 | 6.99E-05 |
| 13 | 29311798  | rs12855922  | C | T | 0.4589 | 1.0183 | -0.112  | 0.028  | 7.02E-05 |
| 8  | 81253576  | rs148737414 | T | C | 0.0105 | 0.8375 | -0.6066 | 0.1519 | 7.02E-05 |
| 2  | 102747313 | rs1024794   | G | A | 0.2974 | 0.9689 | -0.127  | 0.0318 | 7.04E-05 |
| 2  | 102747313 | rs1024794   | G | A | 0.2974 | 0.9689 | -0.127  | 0.0318 | 7.04E-05 |
| 15 | 79601742  | rs146192528 | A | G | 0.0136 | 0.8418 | -0.5294 | 0.1326 | 7.04E-05 |
| 4  | 10436482  | rs7675445   | C | T | 0.1476 | 0.9515 | 0.1627  | 0.0408 | 7.10E-05 |
| 2  | 64360433  | rs7573532   | A | G | 0.5401 | 0.99   | -0.1138 | 0.0285 | 7.11E-05 |
| 2  | 64360433  | rs7573532   | A | G | 0.5401 | 0.99   | -0.1138 | 0.0285 | 7.11E-05 |
| 3  | 72610393  | rs114820373 | T | C | 0.0205 | 0.8863 | 0.4229  | 0.106  | 7.15E-05 |
| 10 | 104303748 | rs67646802  | T | C | 0.2701 | 0.953  | 0.1301  | 0.0326 | 7.15E-05 |
| 7  | 87070089  | rs11768036  | A | G | 0.0698 | 0.9893 | 0.2234  | 0.056  | 7.17E-05 |
| 13 | 23884476  | rs2770055   | T | C | 0.4941 | 0.9738 | -0.1148 | 0.0288 | 7.20E-05 |

|    |           |             |   |   |        |        |         |        |          |
|----|-----------|-------------|---|---|--------|--------|---------|--------|----------|
| 2  | 84236178  | rs115405840 | G | A | 0.0126 | 0.9211 | 0.5277  | 0.1324 | 7.24E-05 |
| 2  | 84236178  | rs115405840 | G | A | 0.0126 | 0.9211 | 0.5277  | 0.1324 | 7.24E-05 |
| 13 | 29316948  | rs1305103   | C | A | 0.4578 | 1.011  | -0.1123 | 0.0282 | 7.26E-05 |
| 3  | 25438248  | rs144594145 | A | T | 0.0156 | 0.7515 | -0.5254 | 0.1318 | 7.28E-05 |
| 5  | 75234881  | rs4235688   | G | C | 0.4815 | 0.9726 | -0.1149 | 0.0288 | 7.28E-05 |
| 7  | 87070298  | rs45533331  | A | G | 0.0698 | 0.9893 | 0.2232  | 0.056  | 7.29E-05 |
| 3  | 151517616 | rs76034984  | T | C | 0.0332 | 0.9643 | 0.32    | 0.0803 | 7.30E-05 |
| 13 | 93663214  | rs9516149   | C | A | 0.111  | 0.9651 | 0.1822  | 0.0457 | 7.30E-05 |
| 19 | 52493717  | rs1241462   | A | G | 0.9144 | 0.8707 | 0.2148  | 0.0539 | 7.33E-05 |
| 1  | 116491488 | rs114879091 | T | C | 0.0172 | 0.7889 | -0.4875 | 0.1224 | 7.34E-05 |
| 1  | 1069535   | rs113355263 | A | G | 0.0921 | 0.8583 | -0.2096 | 0.0526 | 7.36E-05 |
| 20 | 44445880  | rs113035198 | C | T | 0.0271 | 0.9353 | 0.3573  | 0.0897 | 7.37E-05 |
| 10 | 104532828 | rs12776506  | G | A | 0.3198 | 0.9363 | 0.1244  | 0.0312 | 7.44E-05 |
| 2  | 162653362 | rs1551051   | A | T | 0.7445 | 1.0144 | -0.1281 | 0.0322 | 7.45E-05 |
| 2  | 233490999 | rs2091250   | T | C | 0.6912 | 0.9878 | -0.1234 | 0.031  | 7.45E-05 |
| 2  | 162653362 | rs1551051   | A | T | 0.7445 | 1.0144 | -0.1281 | 0.0322 | 7.45E-05 |
| 2  | 233490999 | rs2091250   | T | C | 0.6912 | 0.9878 | -0.1234 | 0.031  | 7.45E-05 |
| 4  | 10462231  | rs183203239 | T | G | 0.0106 | 0.896  | 0.5772  | 0.145  | 7.45E-05 |
| 1  | 59515972  | rs79349044  | C | A | 0.2033 | 0.9206 | -0.1461 | 0.0367 | 7.48E-05 |
| 3  | 176857157 | rs57242082  | C | A | 0.0235 | 1.0094 | -0.3677 | 0.0924 | 7.50E-05 |
| 3  | 176858770 | rs1316286   | T | G | 0.0235 | 1.0092 | -0.3677 | 0.0924 | 7.50E-05 |
| 12 | 93406190  | rs12231012  | G | T | 0.0232 | 1.0162 | 0.3729  | 0.0937 | 7.50E-05 |
| 5  | 75227767  | rs4704268   | G | A | 0.4682 | 0.9799 | -0.1142 | 0.0287 | 7.50E-05 |
| 7  | 87070096  | rs11767995  | T | C | 0.0699 | 0.9888 | 0.2227  | 0.056  | 7.51E-05 |
| 4  | 10073785  | rs12509082  | A | G | 0.081  | 0.9863 | 0.2075  | 0.0522 | 7.60E-05 |
| 11 | 100564126 | rs17095341  | A | G | 0.0106 | 0.8416 | 0.6001  | 0.151  | 7.61E-05 |
| 13 | 29310643  | rs9578058   | T | A | 0.4596 | 1.0168 | -0.1115 | 0.0281 | 7.61E-05 |
| 13 | 29310467  | rs9578057   | A | T | 0.4596 | 1.0167 | -0.1115 | 0.0281 | 7.62E-05 |
| 4  | 17375165  | rs34004560  | T | C | 0.1378 | 0.92   | 0.1705  | 0.0429 | 7.62E-05 |
| 2  | 2479617   | rs116194950 | T | A | 0.0106 | 0.83   | 0.599   | 0.1507 | 7.63E-05 |

|    |           |             |   |   |        |        |         |        |          |
|----|-----------|-------------|---|---|--------|--------|---------|--------|----------|
| 2  | 2479617   | rs116194950 | T | A | 0.0106 | 0.83   | 0.599   | 0.1507 | 7.63E-05 |
| 11 | 65641033  | rs10896064  | C | G | 0.5549 | 1.0257 | -0.1112 | 0.028  | 7.64E-05 |
| 5  | 94141845  | rs75081050  | G | A | 0.0135 | 0.8094 | 0.5387  | 0.1356 | 7.68E-05 |
| 8  | 102479654 | rs507852    | A | G | 0.9689 | 1.0702 | -0.3112 | 0.0783 | 7.71E-05 |
| 11 | 25382598  | rs529834045 | A | G | 0.0112 | 0.8431 | -0.5794 | 0.1459 | 7.72E-05 |
| 14 | 73470524  | rs10134432  | A | G | 0.0316 | 1.0396 | 0.3157  | 0.0795 | 7.72E-05 |
| 4  | 10106798  | rs12509609  | T | C | 0.07   | 0.9743 | 0.2229  | 0.0561 | 7.77E-05 |
| 17 | 71148027  | rs8064740   | T | C | 0.1826 | 1.0348 | -0.1425 | 0.0359 | 7.78E-05 |
| 5  | 11365825  | rs61750663  | C | A | 0.0125 | 0.9677 | 0.5148  | 0.1297 | 7.78E-05 |
| 5  | 11364595  | rs61750672  | T | G | 0.0125 | 0.9675 | 0.5148  | 0.1297 | 7.78E-05 |
| 9  | 102291854 | rs10819685  | C | G | 0.1052 | 0.875  | 0.1957  | 0.0493 | 7.79E-05 |
| 16 | 65806627  | rs11648644  | C | T | 0.1053 | 0.9842 | 0.1842  | 0.0464 | 7.79E-05 |
| 5  | 11363004  | rs61750682  | A | G | 0.0125 | 0.9676 | 0.5147  | 0.1297 | 7.80E-05 |
| 2  | 8025686   | rs11693863  | T | C | 0.0164 | 0.9621 | 0.4511  | 0.1137 | 7.81E-05 |
| 2  | 8025686   | rs11693863  | T | C | 0.0164 | 0.9621 | 0.4511  | 0.1137 | 7.81E-05 |
| 17 | 71148059  | rs9893457   | T | C | 0.1825 | 1.0343 | -0.1425 | 0.0359 | 7.83E-05 |
| 5  | 11362061  | rs61750690  | T | C | 0.0125 | 0.9682 | 0.5143  | 0.1296 | 7.83E-05 |
| 5  | 11369794  | rs79976016  | A | T | 0.0125 | 0.9664 | 0.5145  | 0.1297 | 7.87E-05 |
| 14 | 73472776  | rs4903088   | T | C | 0.0329 | 1.0296 | 0.3109  | 0.0784 | 7.88E-05 |
| 7  | 138731343 | rs3187141   | A | G | 0.0233 | 1.0249 | 0.3697  | 0.0932 | 7.90E-05 |
| 17 | 71147968  | rs8082088   | C | G | 0.1826 | 1.0355 | -0.1423 | 0.0359 | 7.90E-05 |
| 5  | 79548131  | rs147804141 | A | G | 0.0359 | 0.8866 | 0.3231  | 0.0815 | 7.90E-05 |
| 17 | 71147889  | rs8064580   | T | C | 0.1826 | 1.0355 | -0.1423 | 0.0359 | 7.92E-05 |
| 17 | 71147734  | rs8069963   | T | C | 0.1826 | 1.0365 | -0.1422 | 0.0359 | 7.92E-05 |
| 16 | 68027854  | rs142421824 | G | C | 0.013  | 0.9362 | 0.5121  | 0.1291 | 7.93E-05 |
| 4  | 99138280  | rs116515688 | T | G | 0.0155 | 0.7876 | 0.512   | 0.1292 | 7.94E-05 |
| 22 | 36646839  | rs5756114   | T | C | 0.2109 | 0.9615 | 0.1399  | 0.0353 | 7.95E-05 |
| 14 | 73475755  | rs4903091   | T | C | 0.0329 | 1.0302 | 0.3107  | 0.0784 | 7.96E-05 |
| 10 | 104528509 | rs11191394  | C | A | 0.3199 | 0.9358 | 0.1239  | 0.0313 | 7.96E-05 |
| 17 | 71147862  | rs8069173   | C | T | 0.1826 | 1.0369 | -0.1421 | 0.0359 | 7.98E-05 |

|    |           |             |   |   |        |        |         |        |          |
|----|-----------|-------------|---|---|--------|--------|---------|--------|----------|
| 10 | 104523634 | rs12775376  | A | G | 0.3199 | 0.937  | 0.1238  | 0.0312 | 7.99E-05 |
| 12 | 106306914 | rs74969942  | G | A | 0.0157 | 0.8155 | 0.4962  | 0.1252 | 8.01E-05 |
| 15 | 92444871  | rs72750075  | C | T | 0.086  | 0.986  | -0.201  | 0.0507 | 8.01E-05 |
| 14 | 73466463  | rs10138468  | T | C | 0.0318 | 1.0318 | 0.3152  | 0.0795 | 8.02E-05 |
| 3  | 71990143  | rs138114136 | G | A | 0.0182 | 0.9036 | 0.4391  | 0.1108 | 8.02E-05 |
| 10 | 104513049 | rs11191385  | T | G | 0.3188 | 0.9447 | 0.1234  | 0.0311 | 8.04E-05 |
| 17 | 71147708  | rs8070513   | G | A | 0.1826 | 1.0365 | -0.1421 | 0.0359 | 8.04E-05 |
| 8  | 20146260  | rs7012277   | T | C | 0.0692 | 0.9482 | 0.2281  | 0.0576 | 8.05E-05 |
| 2  | 125330422 | rs1542918   | T | A | 0.9805 | 0.9659 | -0.4122 | 0.1041 | 8.07E-05 |
| 2  | 125330422 | rs1542918   | T | A | 0.9805 | 0.9659 | -0.4122 | 0.1041 | 8.07E-05 |
| 4  | 10277869  | rs11736814  | C | T | 0.0265 | 0.9538 | 0.3568  | 0.0901 | 8.12E-05 |
| 10 | 104288777 | rs1536308   | G | T | 0.3232 | 0.9843 | -0.1202 | 0.0304 | 8.13E-05 |
| 20 | 62120948  | rs1757785   | T | C | 0.5234 | 0.9617 | 0.1148  | 0.029  | 8.23E-05 |
| 21 | 37547518  | rs11702069  | C | T | 0.4707 | 1.0111 | -0.1114 | 0.0281 | 8.24E-05 |
| 16 | 15499997  | rs12927590  | G | A | 0.0799 | 0.7502 | 0.2378  | 0.0601 | 8.25E-05 |
| 4  | 10097446  | rs3796820   | A | G | 0.0692 | 0.9593 | 0.2249  | 0.0569 | 8.26E-05 |
| 13 | 93672943  | rs308254    | A | T | 0.8857 | 0.9553 | -0.1797 | 0.0454 | 8.27E-05 |
| 5  | 16852734  | rs7719940   | C | T | 0.2842 | 0.9447 | -0.1275 | 0.0322 | 8.30E-05 |
| 21 | 37553209  | rs7275804   | C | T | 0.3302 | 0.9877 | -0.1198 | 0.0303 | 8.30E-05 |
| 21 | 37553248  | rs2835299   | T | C | 0.3304 | 0.9895 | -0.1197 | 0.0303 | 8.32E-05 |
| 16 | 9684775   | rs12921634  | G | A | 0.1439 | 1.0025 | 0.1587  | 0.0401 | 8.32E-05 |
| 12 | 114281011 | rs3782427   | A | G | 0.1657 | 0.9491 | 0.1545  | 0.0391 | 8.35E-05 |
| 3  | 9552457   | rs145987757 | C | A | 0.0359 | 0.9236 | -0.3121 | 0.079  | 8.39E-05 |
| 13 | 25562174  | rs12585964  | C | T | 0.1431 | 0.9754 | 0.1619  | 0.041  | 8.41E-05 |
| 8  | 23935531  | rs78669873  | G | A | 0.0101 | 0.9901 | 0.5633  | 0.1426 | 8.42E-05 |
| 4  | 10110878  | rs76754641  | C | T | 0.0706 | 0.9662 | 0.2218  | 0.0562 | 8.50E-05 |
| 13 | 29328854  | rs1536900   | C | T | 0.4653 | 1.0098 | -0.1112 | 0.0282 | 8.51E-05 |
| 6  | 148103855 | rs17077323  | G | A | 0.0789 | 0.9441 | 0.2132  | 0.054  | 8.53E-05 |
| 3  | 176718089 | rs62298919  | C | G | 0.0221 | 0.8677 | -0.4055 | 0.1027 | 8.53E-05 |
| 18 | 61135583  | rs7233385   | C | G | 0.4606 | 0.9851 | -0.1129 | 0.0286 | 8.54E-05 |

|    |           |             |   |   |        |        |         |        |          |
|----|-----------|-------------|---|---|--------|--------|---------|--------|----------|
| 4  | 10115139  | rs71603987  | A | G | 0.0708 | 0.9664 | 0.2214  | 0.0561 | 8.56E-05 |
| 5  | 142878977 | rs73797758  | A | C | 0.0111 | 0.9872 | -0.5373 | 0.1361 | 8.57E-05 |
| 5  | 75232842  | rs34268756  | C | T | 0.4663 | 0.9815 | -0.1132 | 0.0287 | 8.59E-05 |
| 19 | 43324908  | rs147520235 | T | A | 0.0324 | 0.7984 | 0.3527  | 0.0894 | 8.59E-05 |
| 3  | 108908581 | rs6797888   | C | T | 0.0243 | 1.011  | 0.3598  | 0.0912 | 8.60E-05 |
| 5  | 111015405 | rs1673758   | T | C | 0.7924 | 0.9675 | -0.1398 | 0.0354 | 8.61E-05 |
| 6  | 97766783  | rs369767725 | A | G | 0.0109 | 0.8097 | 0.5956  | 0.151  | 8.62E-05 |
| 2  | 241035359 | rs116099385 | G | A | 0.0455 | 0.7913 | 0.2997  | 0.076  | 8.64E-05 |
| 2  | 241035359 | rs116099385 | G | A | 0.0455 | 0.7913 | 0.2997  | 0.076  | 8.64E-05 |
| 15 | 33116047  | rs77312922  | C | T | 0.0101 | 0.9284 | 0.5773  | 0.1464 | 8.64E-05 |
| 4  | 10295852  | rs74723388  | T | C | 0.0286 | 0.9504 | 0.3423  | 0.0868 | 8.67E-05 |
| 14 | 73453530  | rs7154084   | A | G | 0.0301 | 1.0309 | 0.3225  | 0.0818 | 8.68E-05 |
| 4  | 10054337  | rs12108388  | A | T | 0.0812 | 0.9789 | 0.2064  | 0.0523 | 8.68E-05 |
| 12 | 114294019 | rs11066791  | C | G | 0.1665 | 0.9521 | 0.1537  | 0.039  | 8.68E-05 |
| 17 | 71146408  | rs9892282   | T | C | 0.1825 | 1.0355 | -0.1415 | 0.0359 | 8.70E-05 |
| 9  | 90500224  | rs58932350  | T | C | 0.0419 | 0.9773 | 0.2833  | 0.0719 | 8.71E-05 |
| 5  | 159378582 | rs6884129   | C | G | 0.0936 | 0.9792 | 0.1937  | 0.0491 | 8.73E-05 |
| 2  | 162640725 | rs2892792   | G | A | 0.7447 | 1.025  | -0.1262 | 0.032  | 8.74E-05 |
| 2  | 162640725 | rs2892792   | G | A | 0.7447 | 1.025  | -0.1262 | 0.032  | 8.74E-05 |
| 4  | 10143250  | rs71603991  | G | A | 0.071  | 1.0022 | 0.2169  | 0.055  | 8.75E-05 |
| 1  | 59524507  | rs17118653  | A | G | 0.2307 | 0.9774 | -0.134  | 0.034  | 8.75E-05 |
| 3  | 172533725 | rs4491935   | A | G | 0.1715 | 1.0117 | 0.1468  | 0.0372 | 8.76E-05 |
| 21 | 37547256  | rs11701901  | T | G | 0.47   | 1.0133 | -0.1108 | 0.0281 | 8.76E-05 |
| 12 | 114294570 | rs1559836   | T | C | 0.1665 | 0.9522 | 0.1536  | 0.039  | 8.78E-05 |
| 1  | 59528234  | rs9970411   | T | C | 0.2302 | 0.9817 | -0.1338 | 0.034  | 8.78E-05 |
| 17 | 71145132  | rs72846723  | A | G | 0.1826 | 1.0331 | -0.1415 | 0.0359 | 8.80E-05 |
| 14 | 73401196  | rs10134292  | C | T | 0.966  | 1.0124 | -0.3076 | 0.0781 | 8.81E-05 |
| 4  | 10060984  | rs11727418  | T | C | 0.0691 | 0.9739 | 0.223   | 0.0566 | 8.84E-05 |
| 5  | 142883391 | rs73797766  | C | G | 0.0111 | 0.9868 | -0.5354 | 0.136  | 8.86E-05 |
| 5  | 75236560  | rs10038303  | A | G | 0.4703 | 0.9713 | -0.1137 | 0.0289 | 8.88E-05 |



|    |           |             |   |   |        |        |         |        |          |
|----|-----------|-------------|---|---|--------|--------|---------|--------|----------|
| 12 | 130888473 | rs73150881  | A | G | 0.0134 | 1.0601 | 0.4722  | 0.1199 | 8.89E-05 |
| 21 | 37550116  | rs2845751   | C | T | 0.3313 | 0.9823 | -0.1195 | 0.0304 | 8.96E-05 |
| 3  | 97402639  | rs75355167  | A | G | 0.0129 | 0.7948 | 0.5516  | 0.1402 | 8.98E-05 |
| 7  | 87047813  | rs7788404   | C | T | 0.0738 | 0.9852 | 0.2158  | 0.0548 | 8.99E-05 |
| 7  | 87047039  | rs35737120  | T | C | 0.0738 | 0.9852 | 0.2158  | 0.0548 | 8.99E-05 |
| 7  | 87040296  | rs45521742  | T | G | 0.0738 | 0.9853 | 0.2158  | 0.0548 | 8.99E-05 |
| 7  | 87045565  | rs45505301  | A | G | 0.0738 | 0.9853 | 0.2158  | 0.0548 | 8.99E-05 |
| 7  | 87046470  | rs4148829   | G | A | 0.0738 | 0.9853 | 0.2158  | 0.0548 | 8.99E-05 |
| 11 | 23582746  | rs16911535  | C | T | 0.0192 | 0.9356 | 0.4283  | 0.1089 | 9.00E-05 |
| 7  | 87036227  | rs45543841  | T | C | 0.0738 | 0.9852 | 0.2158  | 0.0548 | 9.00E-05 |
| 4  | 31195130  | rs116216646 | T | C | 0.03   | 0.8218 | -0.3586 | 0.0912 | 9.05E-05 |
| 3  | 48531227  | rs12491849  | T | C | 0.4079 | 1.0143 | 0.1123  | 0.0286 | 9.06E-05 |
| 2  | 177001962 | rs79025511  | T | C | 0.0126 | 0.9768 | 0.5069  | 0.1289 | 9.08E-05 |
| 2  | 177001962 | rs79025511  | T | C | 0.0126 | 0.9768 | 0.5069  | 0.1289 | 9.08E-05 |
| 1  | 234795238 | rs24185     | A | T | 0.4066 | 1.01   | 0.113   | 0.0287 | 9.08E-05 |
| 14 | 73400038  | rs8004641   | G | A | 0.966  | 1.0116 | -0.3073 | 0.0782 | 9.09E-05 |
| 12 | 111356134 | rs61943011  | C | T | 0.0113 | 0.9632 | 0.5417  | 0.1378 | 9.09E-05 |
| 6  | 166315261 | rs117667378 | T | C | 0.0584 | 0.9881 | 0.2402  | 0.0611 | 9.10E-05 |
| 1  | 59526686  | rs12409598  | T | G | 0.2303 | 0.982  | -0.1335 | 0.034  | 9.10E-05 |
| 15 | 78247331  | rs62008631  | A | G | 0.1464 | 0.8845 | 0.1668  | 0.0424 | 9.12E-05 |
| 8  | 126995981 | rs148815837 | C | A | 0.0126 | 0.833  | 0.5446  | 0.1385 | 9.13E-05 |
| 17 | 71144700  | rs113091587 | A | G | 0.1826 | 1.035  | -0.1411 | 0.0359 | 9.13E-05 |
| 22 | 28178694  | rs45623132  | C | G | 0.0125 | 0.8336 | 0.5453  | 0.1388 | 9.15E-05 |
| 3  | 172533919 | rs4264754   | C | T | 0.1709 | 1.0117 | 0.1466  | 0.0373 | 9.17E-05 |
| 12 | 111351651 | rs61940352  | A | G | 0.0113 | 0.9747 | 0.539   | 0.1372 | 9.17E-05 |
| 16 | 68069280  | rs77184626  | A | G | 0.0128 | 0.9289 | 0.515   | 0.1311 | 9.18E-05 |
| 17 | 71143988  | rs66497426  | C | T | 0.8172 | 1.0343 | 0.141   | 0.0359 | 9.18E-05 |
| 6  | 110620177 | rs41288584  | C | T | 0.0158 | 1.0398 | 0.4358  | 0.1109 | 9.18E-05 |
| 2  | 241039187 | rs114533404 | G | T | 0.0456 | 0.7908 | 0.2982  | 0.0759 | 9.24E-05 |
| 2  | 241039187 | rs114533404 | G | T | 0.0456 | 0.7908 | 0.2982  | 0.0759 | 9.24E-05 |

|    |           |             |   |   |        |        |         |        |          |
|----|-----------|-------------|---|---|--------|--------|---------|--------|----------|
| 10 | 104219908 | rs76085620  | C | T | 0.0418 | 0.9152 | 0.2916  | 0.0743 | 9.25E-05 |
| 17 | 37865659  | rs56114611  | T | C | 0.0124 | 0.8676 | 0.5366  | 0.1367 | 9.28E-05 |
| 12 | 114312417 | rs11066798  | C | T | 0.1695 | 0.9586 | 0.1513  | 0.0385 | 9.29E-05 |
| 16 | 68068768  | rs147014076 | A | G | 0.0128 | 0.928  | 0.5151  | 0.1312 | 9.30E-05 |
| 15 | 92447710  | rs55772252  | C | T | 0.0857 | 0.9851 | -0.1995 | 0.0508 | 9.32E-05 |
| 2  | 177007102 | rs67435554  | T | G | 0.0765 | 0.9897 | 0.2089  | 0.0532 | 9.33E-05 |
| 2  | 177007102 | rs67435554  | T | G | 0.0765 | 0.9897 | 0.2089  | 0.0532 | 9.33E-05 |
| 7  | 138726856 | rs59047924  | C | A | 0.0155 | 0.9673 | 0.4599  | 0.1172 | 9.35E-05 |
| 5  | 134742235 | rs7731133   | T | C | 0.0225 | 0.9389 | -0.3843 | 0.0979 | 9.37E-05 |
| 4  | 10314188  | rs727996    | T | G | 0.0263 | 0.9554 | 0.3553  | 0.0905 | 9.39E-05 |
| 7  | 79561556  | rs37170     | C | T | 0.902  | 1.0394 | -0.1832 | 0.0467 | 9.39E-05 |
| 7  | 79558403  | rs9649000   | C | A | 0.902  | 1.0398 | -0.1831 | 0.0467 | 9.40E-05 |
| 5  | 142887902 | rs73301884  | G | C | 0.0112 | 0.9803 | -0.533  | 0.1359 | 9.42E-05 |
| 7  | 87037158  | rs45443210  | C | G | 0.0744 | 0.9842 | 0.2145  | 0.0547 | 9.42E-05 |
| 7  | 87038074  | rs17149539  | G | A | 0.0744 | 0.9842 | 0.2145  | 0.0547 | 9.42E-05 |
| 7  | 87041856  | rs11761050  | A | C | 0.0744 | 0.9842 | 0.2145  | 0.0547 | 9.42E-05 |
| 7  | 87043583  | rs7807638   | G | A | 0.0744 | 0.9842 | 0.2145  | 0.0547 | 9.42E-05 |
| 21 | 37548110  | rs9983855   | G | A | 0.453  | 1.0154 | -0.1105 | 0.0282 | 9.45E-05 |
| 18 | 47318885  | rs150342704 | A | G | 0.039  | 0.9733 | 0.2907  | 0.0741 | 9.46E-05 |
| 16 | 67938523  | rs545838710 | A | G | 0.0125 | 0.9141 | 0.5232  | 0.1334 | 9.47E-05 |
| 13 | 29312555  | rs1305095   | T | C | 0.4626 | 1.0082 | -0.1105 | 0.0282 | 9.49E-05 |
| 13 | 29312541  | rs1305096   | A | C | 0.4626 | 1.0082 | -0.1105 | 0.0282 | 9.49E-05 |
| 3  | 151540101 | rs76248492  | G | A | 0.0319 | 0.9548 | 0.3227  | 0.0823 | 9.49E-05 |
| 5  | 75231497  | rs4703689   | A | G | 0.4639 | 0.9865 | -0.1123 | 0.0286 | 9.52E-05 |
| 20 | 62119875  | rs7265428   | C | T | 0.4187 | 0.9545 | -0.1159 | 0.0296 | 9.54E-05 |
| 2  | 18427456  | rs115923952 | T | A | 0.0211 | 1.031  | -0.3794 | 0.0968 | 9.55E-05 |
| 2  | 18427456  | rs115923952 | T | A | 0.0211 | 1.031  | -0.3794 | 0.0968 | 9.55E-05 |
| 7  | 87034845  | rs11773089  | T | C | 0.0744 | 0.9831 | 0.2143  | 0.0547 | 9.56E-05 |
| 2  | 18426454  | rs12466959  | G | A | 0.0211 | 1.0304 | -0.3794 | 0.0968 | 9.56E-05 |
| 2  | 18426454  | rs12466959  | G | A | 0.0211 | 1.0304 | -0.3794 | 0.0968 | 9.56E-05 |

|    |           |             |   |   |        |        |         |        |          |
|----|-----------|-------------|---|---|--------|--------|---------|--------|----------|
| 11 | 65603252  | rs7107912   | A | G | 0.525  | 0.9927 | -0.1112 | 0.0284 | 9.57E-05 |
| 4  | 67654510  | rs115002912 | T | C | 0.0243 | 0.8426 | -0.3918 | 0.1    | 9.57E-05 |
| 3  | 30603093  | rs17567548  | G | A | 0.0687 | 0.8353 | -0.2399 | 0.0612 | 9.58E-05 |
| 3  | 151535976 | rs9810654   | A | C | 0.0333 | 0.9512 | 0.3163  | 0.0807 | 9.59E-05 |
| 2  | 235505900 | rs7573410   | C | A | 0.6826 | 0.9206 | 0.1237  | 0.0316 | 9.59E-05 |
| 2  | 235505900 | rs7573410   | C | A | 0.6826 | 0.9206 | 0.1237  | 0.0316 | 9.59E-05 |
| 4  | 10111341  | rs12498746  | T | C | 0.0708 | 0.9708 | 0.2195  | 0.056  | 9.61E-05 |
| 5  | 28620309  | rs4867148   | C | A | 0.1322 | 0.974  | 0.1666  | 0.0425 | 9.63E-05 |
| 12 | 111346613 | rs61940349  | T | C | 0.0112 | 0.983  | 0.5374  | 0.1372 | 9.63E-05 |
| 4  | 10313755  | rs116613191 | G | A | 0.0263 | 0.9563 | 0.3544  | 0.0905 | 9.63E-05 |
| 5  | 159716449 | rs73308692  | G | C | 0.0909 | 0.866  | -0.2062 | 0.0526 | 9.64E-05 |
| 4  | 10085301  | rs2241471   | T | C | 0.0706 | 0.9728 | 0.2195  | 0.056  | 9.64E-05 |
| 9  | 117992142 | rs150433143 | A | C | 0.0153 | 1.0331 | 0.4436  | 0.1133 | 9.66E-05 |
| 3  | 172536130 | rs71310525  | T | A | 0.171  | 1.0088 | 0.1463  | 0.0374 | 9.69E-05 |
| 1  | 234819747 | rs485615    | T | C | 0.4705 | 1.0104 | 0.1106  | 0.0282 | 9.69E-05 |
| 4  | 10101104  | rs2241487   | C | A | 0.0706 | 0.9729 | 0.2193  | 0.056  | 9.73E-05 |
| 12 | 4482973   | rs10744644  | C | T | 0.9765 | 1.007  | -0.3658 | 0.0934 | 9.75E-05 |
| 1  | 234819800 | rs485790    | A | G | 0.4705 | 1.0108 | 0.1105  | 0.0282 | 9.75E-05 |
| 10 | 104422046 | rs4522108   | T | C | 0.3185 | 0.9642 | 0.1215  | 0.031  | 9.77E-05 |
| 1  | 192354156 | rs1936711   | T | A | 0.2705 | 0.9802 | -0.1262 | 0.0322 | 9.77E-05 |
| 12 | 111350807 | rs61940351  | A | G | 0.0111 | 0.9866 | 0.5368  | 0.1371 | 9.77E-05 |
| 4  | 10089121  | rs2241479   | C | T | 0.0706 | 0.9726 | 0.2193  | 0.056  | 9.77E-05 |
| 12 | 111345404 | rs61940348  | T | C | 0.0112 | 0.9817 | 0.5373  | 0.1373 | 9.78E-05 |
| 12 | 4483139   | rs7295857   | C | T | 0.9765 | 1.0075 | -0.3657 | 0.0934 | 9.79E-05 |
| 6  | 9436198   | rs76835941  | A | G | 0.0193 | 0.8211 | 0.4433  | 0.1133 | 9.80E-05 |
| 10 | 19386040  | rs10826941  | T | C | 0.2542 | 0.9988 | -0.1271 | 0.0325 | 9.81E-05 |
| 6  | 148113931 | rs55908285  | A | G | 0.0825 | 0.9258 | 0.209   | 0.0534 | 9.82E-05 |
| 4  | 10099018  | rs3822238   | G | T | 0.0706 | 0.9726 | 0.2192  | 0.056  | 9.82E-05 |
| 5  | 11380024  | rs78575730  | A | C | 0.0126 | 0.9523 | 0.5091  | 0.1301 | 9.82E-05 |
| 10 | 104421679 | rs12570611  | C | G | 0.3185 | 0.9643 | 0.1214  | 0.031  | 9.82E-05 |

|    |           |             |   |   |        |        |         |        |          |
|----|-----------|-------------|---|---|--------|--------|---------|--------|----------|
| 12 | 111343279 | rs61940347  | T | C | 0.0112 | 0.9778 | 0.5375  | 0.1374 | 9.84E-05 |
| 12 | 111351204 | rs146401175 | G | T | 0.0111 | 0.9854 | 0.5367  | 0.1372 | 9.85E-05 |
| 7  | 31996149  | rs73310525  | G | A | 0.1768 | 0.9499 | -0.1486 | 0.038  | 9.86E-05 |
| 7  | 87032251  | rs45437295  | T | G | 0.0746 | 0.9818 | 0.2139  | 0.0547 | 9.90E-05 |
| 2  | 239469653 | rs62194972  | A | G | 0.3069 | 1.0143 | -0.1197 | 0.0306 | 9.92E-05 |
| 2  | 239469653 | rs62194972  | A | G | 0.3069 | 1.0143 | -0.1197 | 0.0306 | 9.92E-05 |
| 12 | 111351932 | rs148639029 | A | C | 0.0111 | 0.9842 | 0.5366  | 0.1372 | 9.92E-05 |
| 4  | 10141515  | rs11735463  | C | T | 0.0709 | 1.0064 | 0.2148  | 0.0549 | 9.92E-05 |
| 12 | 111339307 | rs61940346  | A | C | 0.0112 | 0.9716 | 0.5382  | 0.1376 | 9.93E-05 |
| 10 | 44304600  | rs78931007  | C | A | 0.0553 | 0.9974 | -0.2416 | 0.0618 | 9.93E-05 |
| 12 | 111373510 | rs61943022  | A | C | 0.0145 | 0.9295 | 0.4843  | 0.1239 | 9.93E-05 |
| 12 | 111337298 | rs144597752 | G | A | 0.0112 | 0.9679 | 0.5386  | 0.1378 | 9.94E-05 |
| 6  | 148113313 | rs3966656   | A | G | 0.0824 | 0.9257 | 0.2088  | 0.0534 | 9.94E-05 |
| 21 | 37548099  | rs9984009   | A | G | 0.4671 | 1.0081 | -0.1102 | 0.0282 | 9.95E-05 |
| 10 | 104241983 | rs12763720  | C | T | 0.2314 | 0.9313 | 0.1358  | 0.0347 | 9.95E-05 |
| 2  | 8018940   | rs73153537  | G | T | 0.0146 | 1.008  | 0.4612  | 0.118  | 9.96E-05 |
| 2  | 8018940   | rs73153537  | G | T | 0.0146 | 1.008  | 0.4612  | 0.118  | 9.96E-05 |
| 15 | 92448712  | rs72750081  | C | G | 0.0858 | 0.9869 | -0.1984 | 0.0507 | 9.98E-05 |
| 1  | 192352776 | rs1936712   | T | C | 0.2704 | 0.9826 | -0.1259 | 0.0322 | 9.98E-05 |
| 15 | 31973676  | rs147900146 | G | A | 0.0124 | 0.867  | 0.5362  | 0.1372 | 9.99E-05 |
| 21 | 37553132  | rs11911615  | G | T | 0.3295 | 0.9838 | -0.1187 | 0.0304 | 9.99E-05 |

## References

1. Abu Zaid MI, Menendez AG, El Charif O, Fung C, Monahan PO, Feldman DR, Hamilton RJ, Vaughn DJ, Beard C, Cook R, Althouse SK, Sesso HD, Ardeshirrouhanifard S, Dinh PC, Einhorn L, Fosså S, Travis LB, and For the Platinum Study Group. Adverse health outcomes in relationship to hypogonadism (HG) after platinum-based chemotherapy: A multicenter study of North American testicular cancer survivors (TCS). *Journal of Clinical Oncology* 2017 35:18\_suppl, LBA10012-LBA10012.
2. Kerns SL, Fung C, Monahan PO, Ardeshir-Rouhani-Fard S, Abu Zaid MI, Williams AM, et al. Cumulative Burden of Morbidity Among Testicular Cancer Survivors After Standard Cisplatin-Based Chemotherapy: A Multi-Institutional Study. *J Clin Oncol.* 2018;36:1505-123.
3. Dolan ME, El Charif O, Wheeler HE, Gamazon ER, Ardeshir-Rouhani-Fard S, Monahan P, et al. Clinical and Genome-Wide Analysis of Cisplatin-Induced Peripheral Neuropathy in Survivors of Adult-Onset Cancer. *Clin Cancer Res.* 2017;23:5757-68.
4. Frisina RD, Wheeler HE, Fossa SD, Kerns SL, Fung C, Sesso HD, et al. Comprehensive Audiometric Analysis of Hearing Impairment and Tinnitus After Cisplatin-Based Chemotherapy in Survivors of Adult-Onset Cancer. *J Clin Oncol.* 2016;34:2712-20.
